# Supplementary material for: The microbiome profiling of fungivorous black tinder fungus beetle Bolitophagus reticulatus reveals the insight into bacterial communities associated with larvae and adults
Source: PeerJ. 2019 May 7;7:e6852. doi: 10.7717/peerj.6852 (PMC6510215; doi:10.7717/peerj.6852)
Supplement: Table S2 — The table shows the relative abundance of microbial 16S rDNA sequences for each stage, at different taxonomic levels. [file peerj-07-6852-s002.xlsx]

## Sheet: table_mc38188_sorted_L6
Kingdom	Phylum	Class	Order	Family	Genus	AI1	AI2	AI3	AL1	AL2	AL3	BI1	BI2	BI3	BL1	BL2	BL3
Archaea	Euryarchaeota	Methanobacteria	Methanobacteriales	Methanobacteriaceae	Methanobrevibacter	0	0.000116272	0	0	0	0	0	0	0	0.000598993	0	0
Bacteria	Ambiguous_taxa	Ambiguous_taxa	Ambiguous_taxa	Ambiguous_taxa	Arachis duranensis	0.000162731	0.000193787	0.00070609	0	0.00146208	0.000553755	5.59151e-05	1.66962e-05	1.35399e-05	0.0106321	0.00130931	0.000731776
Bacteria	Acidobacteria	Acidobacteriia	Acidobacteriales	Acidobacteriaceae (Subgroup 1)	Ambiguous_taxa	0.000142389	0.00075577	0.000304903	5.65827e-05	0	0	0.000517215	0.00141917	0.00217992	0	0	2.81452e-05
Bacteria	Acidobacteria	Acidobacteriia	Acidobacteriales	Acidobacteriaceae (Subgroup 1)	Acidicapsa	0	0	0	0	0	0	0.000181724	5.00885e-05	0.000148938	0	0	0
Bacteria	Acidobacteria	Acidobacteriia	Acidobacteriales	Acidobacteriaceae (Subgroup 1)	Acidipila	0.000793312	0.00240296	0.0162882	0.00780841	0	2.05095e-05	0.0600668	0.0217885	0.0746453	0	0	0
Bacteria	Acidobacteria	Acidobacteriia	Acidobacteriales	Acidobacteriaceae (Subgroup 1)	Acidobacterium	0	0	0	0	0	0	1.39788e-05	0	1.35399e-05	0	0	0
Bacteria	Acidobacteria	Acidobacteriia	Acidobacteriales	Acidobacteriaceae (Subgroup 1)	Bryocella	0	0	0	0	0	0	8.38727e-05	0.000150265	9.4779e-05	0	0	0
Bacteria	Acidobacteria	Acidobacteriia	Acidobacteriales	Acidobacteriaceae (Subgroup 1)	Edaphobacter	0.000345803	3.87574e-05	0	0.00776597	0	0	0.000167745	0.000450796	0.000406196	0	0	1.40726e-05
Bacteria	Acidobacteria	Acidobacteriia	Acidobacteriales	Acidobacteriaceae (Subgroup 1)	Granulicella	0	0.0011821	6.419e-05	0	0	0.00145617	0.0034947	0.00671186	0.00713551	0	0	0.000394033
Bacteria	Acidobacteria	Acidobacteriia	Acidobacteriales	Acidobacteriaceae (Subgroup 1)	Occallatibacter	0	0	0.000561663	0	0	0	0.000125809	0.000133569	0.000230178	0	0	0
Bacteria	Acidobacteria	Acidobacteriia	Acidobacteriales	Acidobacteriaceae (Subgroup 1)	Terriglobus	2.03413e-05	0.00189911	0.00393164	0	0	0	0.00728294	0.00941664	0.0103174	0	0	1.40726e-05
Bacteria	Acidobacteria	Acidobacteriia	Acidobacteriales	Acidobacteriaceae (Subgroup 1)	uncultured	0	0.00430208	0.00038514	0	0	0.000266623	0.00466891	0.0187498	0.00771772	0	0	0.00268787
Bacteria	Acidobacteria	Acidobacteriia	Acidobacteriales	Acidobacteriaceae (Subgroup 1)	uncultured bacterium	0	0	0	0	0	0	2.79576e-05	0	2.70797e-05	0	0	0
Bacteria	Acidobacteria	Acidobacteriia	Solibacterales	Solibacteraceae (Subgroup 3)	Bryobacter	0.000366144	0	0.000545615	0	0	0	0.00566141	0.00492537	0.00334435	0	0.0122028	0.0011821
Bacteria	Acidobacteria	Acidobacteriia	Solibacterales	Solibacteraceae (Subgroup 3)	Candidatus Solibacter	0	0	0	0	0	0	5.59151e-05	0.000166962	0.000176018	0	0	0
Bacteria	Acidobacteria	Blastocatellia (Subgroup 4)	43793	Ambiguous_taxa	Ambiguous_taxa	0	0	0	0	0.0026487	0	0	0	0	0	5.23725e-05	0
Bacteria	Acidobacteria	Blastocatellia (Subgroup 4)	43793	uncultured Acidobacteria bacterium	uncultured Acidobacteria bacterium	0	0	0	0	0	0	0	0	0	0	0.00350896	0
Bacteria	Acidobacteria	Blastocatellia (Subgroup 4)	Blastocatellales	Blastocatellaceae	Ambiguous_taxa	0	5.81362e-05	0.000369093	0.0050783	0	0	0	0	1.35399e-05	1.87185e-05	0.00117838	0
Bacteria	Acidobacteria	Blastocatellia (Subgroup 4)	Blastocatellales	Blastocatellaceae	Blastocatella	0	0	0	0	0	0.00188687	0	3.33923e-05	0	0.0013103	0	0
Bacteria	Acidobacteria	Blastocatellia (Subgroup 4)	Blastocatellales	Blastocatellaceae	JGI 0001001-H03	0	0.000116272	0	0	0	0	0	0	0	0	0	0
Bacteria	Acidobacteria	Blastocatellia (Subgroup 4)	Blastocatellales	Blastocatellaceae	OLB17	0	0	0	0	0	0	0	0	0	0.00190929	0	0
Bacteria	Acidobacteria	Blastocatellia (Subgroup 4)	Blastocatellales	Blastocatellaceae	Stenotrophobacter	0	1.93787e-05	0	0	0	0	0	0	0	0.00140389	0	0
Bacteria	Acidobacteria	Blastocatellia (Subgroup 4)	Pyrinomonadales	Pyrinomonadaceae	RB41	0	0	0.00019257	0	0	0	0	0	0	0	0	0
Bacteria	Acidobacteria	Holophagae	Subgroup 7	uncultured bacterium	uncultured bacterium	0	0	0	0	0	0	0	1.66962e-05	1.35399e-05	0	0	0
Bacteria	Acidobacteria	Subgroup 17	uncultured bacterium	uncultured bacterium	uncultured bacterium	0	0	0	0	0.00103829	0	0	0	0	0	0	0
Bacteria	Acidobacteria	Subgroup 6	Ambiguous_taxa	Ambiguous_taxa	Ambiguous_taxa	0	0	0	0.00417297	0	0	0	0	0	0	0	0
Bacteria	Acidobacteria	Subgroup 6	uncultured bacterium	uncultured bacterium	uncultured bacterium	0	0	0	0	0	0	0	0	0	0	0	0.000605122
Bacteria	Actinobacteria	Acidimicrobiia	IMCC26256	uncultured actinobacterium	uncultured actinobacterium	0.000325461	0.000174408	0	0.00912396	0.000466171	2.05095e-05	4.19363e-05	0	0.000270797	0.00269547	0.00235676	0.00567126
Bacteria	Actinobacteria	Acidimicrobiia	IMCC26256	uncultured bacterium	uncultured bacterium	0	0	0.0113295	7.07284e-05	0	0	0	0	0	3.74371e-05	5.23725e-05	5.62905e-05
Bacteria	Actinobacteria	Acidimicrobiia	Microtrichales	Iamiaceae	Iamia	0	0	0.000882613	0	0	0	0	3.33923e-05	8.12392e-05	0	0	0
Bacteria	Actinobacteria	Acidimicrobiia	Microtrichales	Ilumatobacteraceae	CL500-29 marine group	0	0	0	0	0	0	0	1.66962e-05	5.41594e-05	0	0	0
Bacteria	Actinobacteria	Acidimicrobiia	Microtrichales	Ilumatobacteraceae	Ilumatobacter	0	0	0	0	0	0.00075885	0	0	0	0	0	0
Bacteria	Actinobacteria	Acidimicrobiia	Microtrichales	Ilumatobacteraceae	uncultured	0	0.000329438	0	0	0.00574238	0.00178432	0	6.67847e-05	0	0	0	0
Bacteria	Actinobacteria	Acidimicrobiia	Microtrichales	Microtrichaceae	uncultured	0	0	0	0	0	0	6.98939e-05	0	0	0	0.00178066	0
Bacteria	Actinobacteria	Acidimicrobiia	uncultured	Ambiguous_taxa	Ambiguous_taxa	0	0	4.81425e-05	0	0	0	0	0	0	0.000205904	0	0
Bacteria	Actinobacteria	Acidimicrobiia	uncultured	uncultured bacterium	uncultured bacterium	0	0	0.000433283	0	0	0	0	3.33923e-05	0	0.00170339	0	0
Bacteria	Actinobacteria	Actinobacteria	Actinomycetales	Actinomycetaceae	Actinomyces	0	0	0	0	0	0.00205095	0	0	1.35399e-05	0	0.00115219	0
Bacteria	Actinobacteria	Actinobacteria	Bifidobacteriales	Bifidobacteriaceae	Gardnerella	0	0	0.000240713	0	0	0	0	0	0	0	0	0
Bacteria	Actinobacteria	Actinobacteria	Catenulisporales	Catenulisporaceae	Catenulispora	0	0	0	0	0	0	0	0.000116873	8.12392e-05	0	0	0
Bacteria	Actinobacteria	Actinobacteria	Corynebacteriales	Corynebacteriaceae	Corynebacterium	0.000101707	0	0	0	0	0.000533246	4.19363e-05	0	0	0	0	0
Bacteria	Actinobacteria	Actinobacteria	Corynebacteriales	Corynebacteriaceae	Corynebacterium 1	2.03413e-05	9.68936e-05	0.00335393	0.00647872	0	0.00475819	0.00011183	0	4.06196e-05	0.013365	0.00387556	0.0146918
Bacteria	Actinobacteria	Actinobacteria	Corynebacteriales	Corynebacteriaceae	Lawsonella	0.000142389	0	0.00207013	0.00292815	0.0370394	0.00244063	0.000167745	1.66962e-05	0.000121859	0.01636	0.00701791	0.0148044
Bacteria	Actinobacteria	Actinobacteria	Corynebacteriales	Corynebacteriaceae	Turicella	0	0	0.00197384	0.0200586	0.0149175	0.000410189	0	0	4.06196e-05	0.00524119	0	0.00664227
Bacteria	Actinobacteria	Actinobacteria	Corynebacteriales	Dietziaceae	Dietzia	0	0	0.00218246	0	0	0	0	0	0	0	0	0
Bacteria	Actinobacteria	Actinobacteria	Corynebacteriales	Mycobacteriaceae	Mycobacterium	0.119627	0.0867973	0.00964455	0.025349	0.0389041	0.00479921	0.0820974	0.0468661	0.0941833	0.00398705	2.61862e-05	0.025584
Bacteria	Actinobacteria	Actinobacteria	Corynebacteriales	Nocardiaceae	Ambiguous_taxa	0	0	0	0	0	0.000697321	0	0	0	0	0	0
Bacteria	Actinobacteria	Actinobacteria	Corynebacteriales	Nocardiaceae	Gordonia	0.0091536	0.00674379	0.000545615	0.00123067	0.00656877	0	0.00419363	0.004341	0.00490143	0.000149748	2.61862e-05	0
Bacteria	Actinobacteria	Actinobacteria	Corynebacteriales	Nocardiaceae	Millisia	2.03413e-05	1.93787e-05	0	0	0	0	1.39788e-05	1.66962e-05	1.35399e-05	0	0	0
Bacteria	Actinobacteria	Actinobacteria	Corynebacteriales	Nocardiaceae	Nocardia	0	0	0	0	0	0	0	0.000116873	0.000230178	0	0	0
Bacteria	Actinobacteria	Actinobacteria	Corynebacteriales	Nocardiaceae	Rhodococcus	0.00258335	0.000387574	0.00133194	4.2437e-05	0.00544572	0.00514787	0.000475279	0.00240425	0.00127275	0.00479194	0.00586572	0.000379961
Bacteria	Actinobacteria	Actinobacteria	Corynebacteriales	Nocardiaceae	Williamsia	0.0131608	0.00955371	0.0129182	0.00592704	0.0291781	0.00342508	0.00156562	0.0034728	0.00289753	0.0102016	0.0066513	0.00935829
Bacteria	Actinobacteria	Actinobacteria	Corynebacteriales	Segniliparaceae	Segniliparus	0	0	0.00012838	0	0	0	0	0	1.35399e-05	0	0	0
Bacteria	Actinobacteria	Actinobacteria	Corynebacteriales	Tsukamurellaceae	Tsukamurella	0	0	0.000288855	9.90197e-05	0.000127137	2.05095e-05	0.000657003	0.0026046	0.00176018	0	0	0.00413735
Bacteria	Actinobacteria	Actinobacteria	Frankiales	Acidothermaceae	Acidothermus	0	0.000135651	0.00038514	0	0	0	0.000293554	0	0.000243718	0	0	0
Bacteria	Actinobacteria	Actinobacteria	Frankiales	Cryptosporangiaceae	Cryptosporangium	0	0	0	0	0	0	0	0	0	0	0	0.00116803
Bacteria	Actinobacteria	Actinobacteria	Frankiales	Cryptosporangiaceae	Fodinicola	0	0	0	0	0	0	0	0	5.41594e-05	0.00228366	0	0
Bacteria	Actinobacteria	Actinobacteria	Frankiales	Frankiaceae	Jatrophihabitans	0.00172901	0.000368196	0.00102704	0.00301303	0.020681	0.00147668	0.00492053	0.00363976	0.00425152	0	0	0.00128061
Bacteria	Actinobacteria	Actinobacteria	Frankiales	Frankiaceae	uncultured bacterium	0	0	0	0	0	0	1.39788e-05	5.00885e-05	1.35399e-05	0	0	0
Bacteria	Actinobacteria	Actinobacteria	Frankiales	Geodermatophilaceae	Blastococcus	0	0	0	0.00488026	0	0	0	0	0	0	0	0.00586828
Bacteria	Actinobacteria	Actinobacteria	Frankiales	Nakamurellaceae	Nakamurella	0.0188157	0.0261613	0.0108481	0.00819034	0.0119721	0.00319947	0.0288522	0.0223896	0.0210139	0.00248956	0	0.00379961
Bacteria	Actinobacteria	Actinobacteria	Frankiales	Sporichthyaceae	Sporichthya	4.06827e-05	0	0.00038514	0	0	0	0	1.66962e-05	1.35399e-05	0	0	0.000281452
Bacteria	Actinobacteria	Actinobacteria	Frankiales	Sporichthyaceae	hgcI clade	0	0	0	0	0	0	0	0	2.70797e-05	0	0	0
Bacteria	Actinobacteria	Actinobacteria	Frankiales	uncultured	Ambiguous_taxa	0.00030512	0	0	0.00430028	0	0.000881907	2.79576e-05	3.33923e-05	1.35399e-05	0.0023211	0.00212109	0.00289896
Bacteria	Actinobacteria	Actinobacteria	Frankiales	uncultured	uncultured actinobacterium	0	0	0	5.65827e-05	0	0	0	0	0	0	0	1.40726e-05
Bacteria	Actinobacteria	Actinobacteria	Frankiales	uncultured	uncultured bacterium	0	0	0	1.41457e-05	4.23792e-05	2.05095e-05	0	6.67847e-05	0	0	5.23725e-05	0.000140726
Bacteria	Actinobacteria	Actinobacteria	Kineosporiales	Kineosporiaceae	Kineosporia	0	0	1.60475e-05	0	0	0	5.59151e-05	0	0	0	0	0
Bacteria	Actinobacteria	Actinobacteria	Kineosporiales	Kineosporiaceae	uncultured bacterium	0	0.000310059	0	1.41457e-05	0	0	6.98939e-05	0	0	0	0	1.40726e-05
Bacteria	Actinobacteria	Actinobacteria	Micrococcales	Ambiguous_taxa	Ambiguous_taxa	0	0	0	0	0	0	0	0	0	0	0	2.81452e-05
Bacteria	Actinobacteria	Actinobacteria	Micrococcales	Bogoriellaceae	Georgenia	0	0.000174408	0	0	0	0	0	0	0	0	0	0
Bacteria	Actinobacteria	Actinobacteria	Micrococcales	Brevibacteriaceae	Brevibacterium	2.03413e-05	0.000174408	0	0	0	0	0	0	2.70797e-05	0.0005054	0.00214727	0
Bacteria	Actinobacteria	Actinobacteria	Micrococcales	Cellulomonadaceae	Ambiguous_taxa	0	0	0	0	0	6.15284e-05	0	0	0	0	0	0
Bacteria	Actinobacteria	Actinobacteria	Micrococcales	Cellulomonadaceae	Cellulomonas	0	0	0	0.00219258	0	0.00114853	0	5.00885e-05	1.35399e-05	0	0	0
Bacteria	Actinobacteria	Actinobacteria	Micrococcales	Dermabacteraceae	Brachybacterium	0	0	0	0	0	0	0	0	0	0	0	0.000309598
Bacteria	Actinobacteria	Actinobacteria	Micrococcales	Dermacoccaceae	Branchiibius	0	0	0	0	0	0	0	0	4.06196e-05	0	0	0
Bacteria	Actinobacteria	Actinobacteria	Micrococcales	Dermacoccaceae	Flexivirga	0	0	0	0	2.11896e-05	0.000922925	1.39788e-05	5.00885e-05	0.000121859	0	0	0
Bacteria	Actinobacteria	Actinobacteria	Micrococcales	Dermacoccaceae	uncultured	0	0	0	0	0	0	0	0.000100177	6.76993e-05	0	0	0
Bacteria	Actinobacteria	Actinobacteria	Micrococcales	Dermatophilaceae	Dermatophilus	0	0	0	0	0	0	0	0	2.70797e-05	0	0	0
Bacteria	Actinobacteria	Actinobacteria	Micrococcales	Intrasporangiaceae	Ambiguous_taxa	0	0	9.6285e-05	0	0.00290297	0.000492227	2.79576e-05	5.00885e-05	0	0.00185313	0	0.0102871
Bacteria	Actinobacteria	Actinobacteria	Micrococcales	Intrasporangiaceae	Intrasporangium	0	0	0	0	2.11896e-05	0	0	0	0	0	0	1.40726e-05
Bacteria	Actinobacteria	Actinobacteria	Micrococcales	Intrasporangiaceae	Phycicoccus	0	0	0	0	2.11896e-05	0	0	0	0	1.87185e-05	0	0.00026738
Bacteria	Actinobacteria	Actinobacteria	Micrococcales	Intrasporangiaceae	Terrabacter	0	0	0	0	0	6.15284e-05	0	1.66962e-05	0	0.000168467	0	0.000211089
Bacteria	Actinobacteria	Actinobacteria	Micrococcales	Intrasporangiaceae	Tetrasphaera	0	0	0	0	0	0	0	0	0	0	0.0043731	0.00064734
Bacteria	Actinobacteria	Actinobacteria	Micrococcales	Microbacteriaceae	Ambiguous_taxa	0.00734322	0.00808093	0.00712509	0	0.0593944	0.0848271	0.00554958	0.00429091	0.00297877	0.00013103	0.000288049	0.00316634
Bacteria	Actinobacteria	Actinobacteria	Micrococcales	Microbacteriaceae	Agromyces	0	0	0	0	0	2.05095e-05	0	0	1.35399e-05	0	0	0
Bacteria	Actinobacteria	Actinobacteria	Micrococcales	Microbacteriaceae	Clavibacter	0	1.93787e-05	0	0	4.23792e-05	6.15284e-05	1.39788e-05	1.66962e-05	1.35399e-05	3.74371e-05	5.23725e-05	0.000182944
Bacteria	Actinobacteria	Actinobacteria	Micrococcales	Microbacteriaceae	Cryobacterium	2.03413e-05	3.87574e-05	0.000144428	0	0.000127137	0.000430699	2.79576e-05	8.34808e-05	1.35399e-05	5.61556e-05	0.000707028	0.000154799
Bacteria	Actinobacteria	Actinobacteria	Micrococcales	Microbacteriaceae	Curtobacterium	0	0	0	0	0	0	0	0	1.35399e-05	0	0	1.40726e-05
Bacteria	Actinobacteria	Actinobacteria	Micrococcales	Microbacteriaceae	Frigoribacterium	8.13653e-05	7.75149e-05	8.02375e-05	0	0.000466171	0.000615284	8.38727e-05	6.67847e-05	4.06196e-05	5.61556e-05	0.000130931	8.44357e-05
Bacteria	Actinobacteria	Actinobacteria	Micrococcales	Microbacteriaceae	Frondihabitans	0.000671264	0.000813906	0	0	2.11896e-05	0.00123057	5.59151e-05	0.000233746	0.000148938	0	2.61862e-05	0.000548832
Bacteria	Actinobacteria	Actinobacteria	Micrococcales	Microbacteriaceae	Gryllotalpicola	0	0	0	0	0	0.00196891	0.000307533	8.34808e-05	4.06196e-05	0	0	0
Bacteria	Actinobacteria	Actinobacteria	Micrococcales	Microbacteriaceae	Gulosibacter	0	0	0	0	4.23792e-05	0.000123057	0	3.33923e-05	1.35399e-05	9.35926e-05	7.85587e-05	0.000112581
Bacteria	Actinobacteria	Actinobacteria	Micrococcales	Microbacteriaceae	Huakuichenia	0	0.000174408	0.000240713	0	0	6.15284e-05	0.000670981	1.66962e-05	0.000257257	0	0.000157117	0
Bacteria	Actinobacteria	Actinobacteria	Micrococcales	Microbacteriaceae	Humibacter	0	0.000329438	0	0	0	0.000471717	0.000615066	0.00021705	0.000365576	0.00241469	0	0.0108781
Bacteria	Actinobacteria	Actinobacteria	Micrococcales	Microbacteriaceae	Leifsonia	0.00711946	0.0079259	0.00808794	0	0.0307249	0.0799253	0.0110852	0.0429592	0.00477957	0.0517567	0.0826176	0.140628
Bacteria	Actinobacteria	Actinobacteria	Micrococcales	Microbacteriaceae	Leucobacter	0.00126116	0.00416642	0.00205408	0	0.0125654	0.0103573	0.000726897	0.00322236	0.000555134	0.00488554	0.00730596	0.00123839
Bacteria	Actinobacteria	Actinobacteria	Micrococcales	Microbacteriaceae	Lysinimonas	2.03413e-05	3.87574e-05	8.02375e-05	0	0.000614498	0.000799869	8.38727e-05	6.67847e-05	1.35399e-05	0	2.61862e-05	2.81452e-05
Bacteria	Actinobacteria	Actinobacteria	Micrococcales	Microbacteriaceae	Microbacterium	2.03413e-05	0.000290681	0.00038514	0	2.11896e-05	0.000635793	0.000754854	8.34808e-05	0.000243718	0	5.23725e-05	2.81452e-05
Bacteria	Actinobacteria	Actinobacteria	Micrococcales	Microbacteriaceae	Mycetocola	0	1.93787e-05	0	0	2.11896e-05	4.10189e-05	0	0	0	0	0	0
Bacteria	Actinobacteria	Actinobacteria	Micrococcales	Microbacteriaceae	Okibacterium	0	0	0	0	4.23792e-05	8.20378e-05	1.39788e-05	3.33923e-05	0	1.87185e-05	0	0.000140726
Bacteria	Actinobacteria	Actinobacteria	Micrococcales	Microbacteriaceae	Parafrigoribacterium	0.000386485	0.000116272	0.00032095	1.41457e-05	0.000466171	0.00229706	0.000279576	0.00123552	9.4779e-05	0.00129158	0.00238295	0.00372924
Bacteria	Actinobacteria	Actinobacteria	Micrococcales	Microbacteriaceae	Rudaibacter	0	0	1.60475e-05	0	2.11896e-05	0.000102547	0	1.66962e-05	0	0	0	1.40726e-05
Bacteria	Actinobacteria	Actinobacteria	Micrococcales	Microbacteriaceae	Salinibacterium	0	0	0	0	4.23792e-05	6.15284e-05	0	1.66962e-05	1.35399e-05	0	7.85587e-05	0
Bacteria	Actinobacteria	Actinobacteria	Micrococcales	Microbacteriaceae	Schumannella	2.03413e-05	0	1.60475e-05	0	4.23792e-05	8.20378e-05	4.19363e-05	0	0	3.74371e-05	5.23725e-05	2.81452e-05
Bacteria	Actinobacteria	Actinobacteria	Micrococcales	Microbacteriaceae	Subtercola	0	0	0	0	6.35687e-05	8.20378e-05	0	5.00885e-05	4.06196e-05	0	0	0
Bacteria	Actinobacteria	Actinobacteria	Micrococcales	Microbacteriaceae	uncultured	0	0	0	0	0	0	4.19363e-05	0	0	0	0	0
Bacteria	Actinobacteria	Actinobacteria	Micrococcales	Micrococcaceae	Ambiguous_taxa	0.00260369	0.00174408	0.00569686	1.41457e-05	0.00286059	0.00771156	0	0	0	1.87185e-05	0	0
Bacteria	Actinobacteria	Actinobacteria	Micrococcales	Micrococcaceae	Arthrobacter	0.000203413	7.75149e-05	0.00110728	0	0.000105948	0.00131261	0	0	2.70797e-05	3.74371e-05	0.00730596	5.62905e-05
Bacteria	Actinobacteria	Actinobacteria	Micrococcales	Micrococcaceae	Kocuria	0	0	0.000272808	1.41457e-05	0.00925985	0.00572214	0.000181724	6.67847e-05	0	0.00909721	0.000523725	0
Bacteria	Actinobacteria	Actinobacteria	Micrococcales	Micrococcaceae	Micrococcus	0.00109843	0.000872042	0.00309717	0.00233404	0.00860297	0.00842939	0.000698939	0	0.000203098	0.0227992	0.00505394	0.0125668
Bacteria	Actinobacteria	Actinobacteria	Micrococcales	Micrococcaceae	Pseudarthrobacter	0	0	0	0	0	0	0	0	0	0	0.000130931	0
Bacteria	Actinobacteria	Actinobacteria	Micrococcales	Micrococcaceae	Renibacterium	0.000203413	0.000232545	0.00109123	0	0	0	0	0	0	0	0	0
Bacteria	Actinobacteria	Actinobacteria	Micrococcales	Micrococcaceae	Rothia	0	0	0	0	0.00760706	0	0	0	2.70797e-05	0	0	0
Bacteria	Actinobacteria	Actinobacteria	Micrococcales	Promicromonosporaceae	Isoptericola	0	0	0	0	0	0	0	0	0.000162478	0	0	0
Bacteria	Actinobacteria	Actinobacteria	Micromonosporales	Micromonosporaceae	Actinoplanes	0	0	0	0	0	0	0.000265597	0	8.12392e-05	0	0	0
Bacteria	Actinobacteria	Actinobacteria	Micromonosporales	Micromonosporaceae	uncultured	0	0	0	0	0	0	0	0.000116873	0	0	0	0
Bacteria	Actinobacteria	Actinobacteria	Propionibacteriales	Nocardioidaceae	Ambiguous_taxa	0	0	0.000112333	0.00599776	0.0071197	0.000205095	0	3.33923e-05	0.000121859	0	0	0
Bacteria	Actinobacteria	Actinobacteria	Propionibacteriales	Nocardioidaceae	Aeromicrobium	0	0	0	0	0.0233297	0.0164486	0	0.000768024	0.000162478	0	0	0
Bacteria	Actinobacteria	Actinobacteria	Propionibacteriales	Nocardioidaceae	Marmoricola	0.000223755	0	0.000850518	0.00401737	0.00300892	0.00695271	1.39788e-05	0.000100177	5.41594e-05	0	0	0
Bacteria	Actinobacteria	Actinobacteria	Propionibacteriales	Nocardioidaceae	Nocardioides	0.000467851	9.68936e-05	0.0172832	0.239571	0.00322082	0.00793716	0.00187316	0.0144088	0.00595754	0.00368755	0.000130931	0.00349001
Bacteria	Actinobacteria	Actinobacteria	Propionibacteriales	Propionibacteriaceae	Cutibacterium	0.000752629	0.00156968	0.00397978	0.0171021	0.0249189	0.00982403	0.000712918	0.000116873	0.000148938	0.0441009	0.0370535	0.0196735
Bacteria	Actinobacteria	Actinobacteria	Propionibacteriales	Propionibacteriaceae	Friedmanniella	2.03413e-05	0	1.60475e-05	0.000339496	0	0.000676812	0	0	0	0	0	0.00855615
Bacteria	Actinobacteria	Actinobacteria	Propionibacteriales	Propionibacteriaceae	Raineyella	0	0	0.00025676	0	0	0	0	0	0	0	0	0
Bacteria	Actinobacteria	Actinobacteria	Pseudonocardiales	Pseudonocardiaceae	Actinomycetospora	0	0	0	0	0	0	8.38727e-05	3.33923e-05	0	0	0	0
Bacteria	Actinobacteria	Actinobacteria	Pseudonocardiales	Pseudonocardiaceae	Crossiella	0	0	6.419e-05	0	0	0	0	0	0	0	0	0
Bacteria	Actinobacteria	Actinobacteria	Pseudonocardiales	Pseudonocardiaceae	Longimycelium	0	0	3.2095e-05	0	0	0	0	0	0	0	0	0
Bacteria	Actinobacteria	Actinobacteria	Pseudonocardiales	Pseudonocardiaceae	Pseudonocardia	0	0.000174408	0	0	0.00830632	0.00381476	9.78515e-05	0.00116873	0.000825932	0.00196545	0	0.00309598
Bacteria	Actinobacteria	Actinobacteria	Streptomycetales	Streptomycetaceae	Ambiguous_taxa	0	0	0	0	0	0	2.79576e-05	0	1.35399e-05	0	0	0
Bacteria	Actinobacteria	Actinobacteria	Streptomycetales	Streptomycetaceae	Allostreptomyces	0	0	0	0	0	0	1.39788e-05	0	1.35399e-05	0	0	0
Bacteria	Actinobacteria	Actinobacteria	Streptomycetales	Streptomycetaceae	Kitasatospora	0	0	0.00032095	0	0.000105948	2.05095e-05	2.79576e-05	0	2.70797e-05	0	2.61862e-05	0
Bacteria	Actinobacteria	Actinobacteria	Streptomycetales	Streptomycetaceae	Streptacidiphilus	0	0	3.2095e-05	0	0	0	0	0	0	0	0	0
Bacteria	Actinobacteria	Actinobacteria	Streptomycetales	Streptomycetaceae	Streptomyces	0.000732288	0.0009108	0.0248897	0.00476709	0.0160193	0.0111982	0.0339125	0.0207032	0.0151105	1.87185e-05	0.00680842	0
Bacteria	Actinobacteria	Coriobacteriia	Coriobacteriales	Atopobiaceae	Atopobium	0	0	0	0	0	0	9.78515e-05	0	0	0	0	0.00681115
Bacteria	Actinobacteria	Coriobacteriia	Coriobacteriales	Atopobiaceae	Olsenella	0	0.000445711	0.00038514	0	0.00349628	0	8.38727e-05	0	1.35399e-05	0	0.0041898	0
Bacteria	Actinobacteria	MB-A2-108	Ambiguous_taxa	Ambiguous_taxa	Ambiguous_taxa	0	0	0	0	0	0	1.39788e-05	0	0	0	0	0.00226569
Bacteria	Actinobacteria	RBG-16-55-12	uncultured bacterium	uncultured bacterium	uncultured bacterium	0	0	0	0	0	0.00176381	0	0	0	0	0	0
Bacteria	Actinobacteria	Rubrobacteria	Rubrobacterales	Rubrobacteriaceae	Rubrobacter	0.000508533	0.000523225	0.000304903	0.00906738	0.00760706	0.000553755	0	1.66962e-05	0	0.00175954	0.0114958	0.00598086
Bacteria	Actinobacteria	Thermoleophilia	Gaiellales	Gaiellaceae	Gaiella	0	0.000135651	0	0	0	0.000779359	0	0	0	0.000786178	0	0
Bacteria	Actinobacteria	Thermoleophilia	Gaiellales	uncultured	Ambiguous_taxa	0	0	0	0.00345154	0	2.05095e-05	2.79576e-05	0	0	0	0	0
Bacteria	Actinobacteria	Thermoleophilia	Gaiellales	uncultured	metagenome	0	0	0	0	0	0	0	1.66962e-05	4.06196e-05	0	0	0
Bacteria	Actinobacteria	Thermoleophilia	Gaiellales	uncultured	uncultured bacterium	0	0	0	0.000834595	0	0	0	1.66962e-05	4.06196e-05	0.000112311	0	0
Bacteria	Actinobacteria	Thermoleophilia	Solirubrobacterales	Ambiguous_taxa	Ambiguous_taxa	0	0	0	0	0	0.000410189	0	0	0	0	0	0
Bacteria	Actinobacteria	Thermoleophilia	Solirubrobacterales	67-14	Ambiguous_taxa	0	0	0	0	0	0	0.000209682	0.000584366	0.000257257	0	0	0
Bacteria	Actinobacteria	Thermoleophilia	Solirubrobacterales	67-14	uncultured bacterium	0	0	0	0	0	0	0	8.34808e-05	0	0	0	0
Bacteria	Actinobacteria	Thermoleophilia	Solirubrobacterales	Solirubrobacteraceae	Ambiguous_taxa	0	0.000193787	0	0	0	0.000984454	1.39788e-05	3.33923e-05	0.000135399	0	0	0
Bacteria	Actinobacteria	Thermoleophilia	Solirubrobacterales	Solirubrobacteraceae	Conexibacter	0	0	0.00038514	0	0	0	0.000293554	0.000116873	0.000162478	0	0	0
Bacteria	Actinobacteria	Thermoleophilia	Solirubrobacterales	Solirubrobacteraceae	Patulibacter	0.00237994	0.00352693	0.00215037	0	0.00286059	0.00137413	0.00057313	0.00317227	0.00361514	0	0	0.00833099
Bacteria	Actinobacteria	Thermoleophilia	Solirubrobacterales	Solirubrobacteraceae	Solirubrobacter	0	0	0	0	0	0	0	3.33923e-05	0	0	0	0
Bacteria	Actinobacteria	Thermoleophilia	Solirubrobacterales	Solirubrobacteraceae	uncultured	0.000183072	5.81362e-05	0	0.00357886	0.00294535	0.000553755	0	0.00140248	0.000473895	0	0	0
Bacteria	Armatimonadetes	Armatimonadia	Armatimonadales	Ambiguous_taxa	Ambiguous_taxa	0	0	0	0.00182479	0	0	0.000293554	0.000384012	0.000514515	0	0	0
Bacteria	Armatimonadetes	Armatimonadia	Armatimonadales	uncultured bacterium	uncultured bacterium	0	0	0	0	0	0	0.00260005	0.000333923	0.00139461	0	0	0
Bacteria	Armatimonadetes	Armatimonadia	Armatimonadales	uncultured soil bacterium	uncultured soil bacterium	0	0	0	0	0	0	0	3.33923e-05	0.000176018	0	0	0
Bacteria	Armatimonadetes	Fimbriimonadia	Fimbriimonadales	Fimbriimonadaceae	Ambiguous_taxa	0	0	0	0	0	0	1.39788e-05	0.000100177	0.000148938	0	0	0
Bacteria	Armatimonadetes	Fimbriimonadia	Fimbriimonadales	Fimbriimonadaceae	metagenome	0	0	0	0	0	0	0.00171939	0.00143587	0.00112381	0	0	0
Bacteria	Armatimonadetes	Fimbriimonadia	Fimbriimonadales	Fimbriimonadaceae	uncultured Armatimonadetes bacterium	0	0	0	0	0	0	4.19363e-05	5.00885e-05	2.70797e-05	0	0	0
Bacteria	Armatimonadetes	Fimbriimonadia	Fimbriimonadales	Fimbriimonadaceae	uncultured bacterium	0	0	4.81425e-05	0	0	0	0.00197101	0.000166962	0.000406196	0	0	0
Bacteria	Atribacteria	JS1	uncultured bacterium	uncultured bacterium	uncultured bacterium	0	0	0.000112333	1.41457e-05	0	0	0	0	0	0	0	0
Bacteria	BRC1	Ambiguous_taxa	Ambiguous_taxa	Ambiguous_taxa	Ambiguous_taxa	8.13653e-05	0	0	0	0	0	0	0	0	0	0	0
Bacteria	Bacteroidetes	Bacteroidia	Bacteroidales	Bacteroidaceae	Bacteroides	0	5.81362e-05	0	0	0	0	0	0	0	0	0	0
Bacteria	Bacteroidetes	Bacteroidia	Bacteroidales	Prevotellaceae	Prevotella	0	0	0	0	0	0	0	0	0	0	0	0.00153392
Bacteria	Bacteroidetes	Bacteroidia	Bacteroidales	Prevotellaceae	Prevotella 7	0	0	0	7.07284e-05	0	0	0	0	0	0	0	0
Bacteria	Bacteroidetes	Bacteroidia	Bacteroidales	Tannerellaceae	Macellibacteroides	0	0	0	0	0.00360223	0	0	0	0	0	0	0
Bacteria	Bacteroidetes	Bacteroidia	Bacteroidetes VC2,1 Bac22	metagenome	metagenome	0	0	0	0	0	0	0	0	5.41594e-05	0	0	0
Bacteria	Bacteroidetes	Bacteroidia	Chitinophagales	37-13	metagenome	0	0	0	0	0	0	9.78515e-05	5.00885e-05	9.4779e-05	0	0	0
Bacteria	Bacteroidetes	Bacteroidia	Chitinophagales	37-13	uncultured Bacteroidetes bacterium	0	0.000135651	0.000433283	0	0	0	0.000181724	0.00111864	0.000284337	0	2.61862e-05	0
Bacteria	Bacteroidetes	Bacteroidia	Chitinophagales	37-13	uncultured bacterium	0	0	0	0	0	0	4.19363e-05	6.67847e-05	2.70797e-05	0	0	0
Bacteria	Bacteroidetes	Bacteroidia	Chitinophagales	Chitinophagaceae	Ambiguous_taxa	0	3.87574e-05	0.000481425	0	0	0.00262521	0	8.34808e-05	6.76993e-05	0	0	0
Bacteria	Bacteroidetes	Bacteroidia	Chitinophagales	Chitinophagaceae	Arachidicoccus	0.00227823	0.00277116	3.2095e-05	0	0	0	0	0.000317227	2.70797e-05	0	0	0
Bacteria	Bacteroidetes	Bacteroidia	Chitinophagales	Chitinophagaceae	Chitinophaga	0	0	4.81425e-05	0	0	0	0.000265597	0.00101847	0.000189558	0	0	0
Bacteria	Bacteroidetes	Bacteroidia	Chitinophagales	Chitinophagaceae	Dinghuibacter	0	0	0	0	0	0	9.78515e-05	0	5.41594e-05	0	2.61862e-05	0
Bacteria	Bacteroidetes	Bacteroidia	Chitinophagales	Chitinophagaceae	Ferruginibacter	0.000122048	0.000310059	0.000160475	0	0	0.000922925	0.00273984	0.0039069	0.00564612	0	0	0
Bacteria	Bacteroidetes	Bacteroidia	Chitinophagales	Chitinophagaceae	Flavitalea	0	5.81362e-05	0	0	0	0.00038968	0	0	0	0	0	0
Bacteria	Bacteroidetes	Bacteroidia	Chitinophagales	Chitinophagaceae	Heliimonas	0	0	0	0	0	0	0	0.000100177	2.70797e-05	0	0	0
Bacteria	Bacteroidetes	Bacteroidia	Chitinophagales	Chitinophagaceae	Niastella	0	0	0	0	0	0	0	0	2.70797e-05	0	0	0
Bacteria	Bacteroidetes	Bacteroidia	Chitinophagales	Chitinophagaceae	Sediminibacterium	0	0	0	0	0	0	0.00011183	0.000667847	0.000500975	0	0	0
Bacteria	Bacteroidetes	Bacteroidia	Chitinophagales	Chitinophagaceae	Taibaiella	0.00140355	0.00377885	0	1.41457e-05	0.00334795	0.000635793	0.00176133	0.00497546	0.00281629	0	0	0
Bacteria	Bacteroidetes	Bacteroidia	Chitinophagales	Chitinophagaceae	uncultured	0.0012815	0.00379823	0.00255155	0	0	0	0.00673777	0.00831469	0.00532117	0	0	0
Bacteria	Bacteroidetes	Bacteroidia	Chitinophagales	Saprospiraceae	OLB8	0	0	0	0.00445589	0	0	0	0	0	0	0	0
Bacteria	Bacteroidetes	Bacteroidia	Cytophagales	Amoebophilaceae	Candidatus Cardinium	0	0	0	0	0	0	9.78515e-05	0	0	0	0	0
Bacteria	Bacteroidetes	Bacteroidia	Cytophagales	Cytophagaceae	Cytophaga	0	5.81362e-05	0	0	0	0	1.39788e-05	0.00065115	0.00230178	0	0	0
Bacteria	Bacteroidetes	Bacteroidia	Cytophagales	Cytophagaceae	Rhodocytophaga	0	0	0	0	0	0	0	0	0	0	0.000183304	0
Bacteria	Bacteroidetes	Bacteroidia	Cytophagales	Cytophagaceae	uncultured bacterium	0	0	0	0	0	0	0	0	5.41594e-05	0	0	0
Bacteria	Bacteroidetes	Bacteroidia	Cytophagales	Hymenobacteraceae	Hymenobacter	0	0	0	0	0	0	0	0	0	0	0	0.00495356
Bacteria	Bacteroidetes	Bacteroidia	Cytophagales	Spirosomaceae	Arcicella	0	0	0.00025676	0	0	0	0	0	0	0	0	0
Bacteria	Bacteroidetes	Bacteroidia	Cytophagales	Spirosomaceae	Dyadobacter	0	0.000251923	0	0	0	0	0	0.000550973	0.000311417	0	0	0
Bacteria	Bacteroidetes	Bacteroidia	Cytophagales	Spirosomaceae	Spirosoma	0	0	0.00032095	0	0	0	0	0	0	0	0	0
Bacteria	Bacteroidetes	Bacteroidia	Flavobacteriales	Crocinitomicaceae	Fluviicola	0	0	0	0	0	0	0	3.33923e-05	6.76993e-05	0	0	0
Bacteria	Bacteroidetes	Bacteroidia	Flavobacteriales	Flavobacteriaceae	Flavobacterium	0	0	0	0	0.00188587	0	5.59151e-05	0.0021872	0.00125921	0	0	0
Bacteria	Bacteroidetes	Bacteroidia	Flavobacteriales	Flavobacteriaceae	Myroides	0.000122048	0	0.00328974	0.00940687	0.0137732	0.0100086	4.19363e-05	0.000200354	2.70797e-05	0.00602737	0.0210275	0.0170279
Bacteria	Bacteroidetes	Bacteroidia	Flavobacteriales	Weeksellaceae	Chryseobacterium	0.000467851	0.000232545	0.000545615	0.00555925	0	0	2.79576e-05	0.00322236	0.00108319	0.0020216	0	0
Bacteria	Bacteroidetes	Bacteroidia	Flavobacteriales	Weeksellaceae	Cloacibacterium	0	0	0	0	0	0	0	0	0	0.00204032	0	0
Bacteria	Bacteroidetes	Bacteroidia	Flavobacteriales	Weeksellaceae	Empedobacter	0	9.68936e-05	0	0	0	0	0	0	0	0	0	0
Bacteria	Bacteroidetes	Bacteroidia	Flavobacteriales	Weeksellaceae	Moheibacter	0	0	0	0	0	0	2.79576e-05	8.34808e-05	8.12392e-05	0	0	0
Bacteria	Bacteroidetes	Bacteroidia	Sphingobacteriales	NS11-12 marine group	Ambiguous_taxa	0	0	0	0	0	0	0	5.00885e-05	0	0	0	0
Bacteria	Bacteroidetes	Bacteroidia	Sphingobacteriales	NS11-12 marine group	uncultured bacterium	0	0	0	0	0	0	0	3.33923e-05	0	0	0	0
Bacteria	Bacteroidetes	Bacteroidia	Sphingobacteriales	Sphingobacteriaceae	Ambiguous_taxa	0	0	0	0	0	0	5.59151e-05	0.00106855	0.000446815	0	0	0
Bacteria	Bacteroidetes	Bacteroidia	Sphingobacteriales	Sphingobacteriaceae	Mucilaginibacter	0.0290678	0.0618375	0.00181337	0	0	0.00685016	0.0258328	0.0606739	0.0741984	0.0130281	0	0.00593864
Bacteria	Bacteroidetes	Bacteroidia	Sphingobacteriales	Sphingobacteriaceae	Pedobacter	0.00760766	0.00426332	0	0	0.0239442	0.029185	0.00301942	0.0862691	0.0301262	0.00398705	2.61862e-05	0.00599493
Bacteria	Bacteroidetes	Bacteroidia	Sphingobacteriales	Sphingobacteriaceae	Sphingobacterium	0	0	0	0	0	0	0	0.00270478	0.000812392	0	0	0
Bacteria	Bacteroidetes	Bacteroidia	Sphingobacteriales	Sphingobacteriaceae	uncultured	0.000203413	0.000174408	0	0	0	0	0	0.0012856	9.4779e-05	0	0	0
Bacteria	Bacteroidetes	Bacteroidia	Sphingobacteriales	env,OPS 17	Ambiguous_taxa	0	0	0	0.00314034	0	2.05095e-05	1.39788e-05	1.66962e-05	5.41594e-05	0	0	0
Bacteria	Bacteroidetes	Bacteroidia	Sphingobacteriales	env,OPS 17	metagenome	0	0	0	0	0	0	0	0	2.70797e-05	0	0	0
Bacteria	Bacteroidetes	Bacteroidia	Sphingobacteriales	env,OPS 17	uncultured Bacteroidetes bacterium	0	0	0	0	0	0	0	6.67847e-05	0	0	0	0
Bacteria	Bacteroidetes	Bacteroidia	Sphingobacteriales	env,OPS 17	uncultured bacterium	0	0	0	0.000339496	0	0	0.000391406	0.0026213	0.000825932	0	0	0
Bacteria	Bacteroidetes	Ignavibacteria	SJA-28	Ambiguous_taxa	Ambiguous_taxa	0	0	0	0	0	0	0	0	0	0.00166595	0	0
Bacteria	Chloroflexi	Anaerolineae	Anaerolineales	Anaerolineaceae	Longilinea	0	0	0	0	0	0	0	0	0	0	0.00259244	0
Bacteria	Chloroflexi	Anaerolineae	Anaerolineales	Anaerolineaceae	uncultured	0	0	0.000497473	0	0	0.000205095	0	0	0	0.00179698	0.0102912	0
Bacteria	Chloroflexi	Anaerolineae	RBG-13-54-9	uncultured Chloroflexi bacterium	uncultured Chloroflexi bacterium	0	0	3.2095e-05	0	0	2.05095e-05	2.79576e-05	0	0	1.87185e-05	0	0
Bacteria	Chloroflexi	Anaerolineae	SBR1031	Ambiguous_taxa	Ambiguous_taxa	0	0	0	0	0	0	0	0	0	0	0	0.000450324
Bacteria	Chloroflexi	Anaerolineae	SBR1031	A4b	uncultured bacterium	0	0	0	0	0	0	0	0	0	0	0	0.000281452
Bacteria	Chloroflexi	Anaerolineae	SBR1031	uncultured bacterium	uncultured bacterium	0	0	0	0	0.00419554	0	0	0	0	0	0	0
Bacteria	Chloroflexi	Chloroflexia	Thermomicrobiales	JG30-KF-CM45	uncultured bacterium	0	0	0.00032095	0	0	0	0	0	0	0	0	0
Bacteria	Chloroflexi	JG30-KF-CM66	uncultured bacterium	uncultured bacterium	uncultured bacterium	0	7.75149e-05	0	0	0	0	0	0	0	0	0	0
Bacteria	Chloroflexi	Ktedonobacteria	C0119	uncultured Chloroflexi bacterium	uncultured Chloroflexi bacterium	0	0	0.000224665	0	0	0	0	0	0	0	0	0
Bacteria	Cyanobacteria	Melainabacteria	Obscuribacterales	Ambiguous_taxa	Ambiguous_taxa	0	0	0	0	0	0	4.19363e-05	3.33923e-05	4.06196e-05	0	0	0
Bacteria	Cyanobacteria	Melainabacteria	Obscuribacterales	uncultured bacterium	uncultured bacterium	0	0	0	0	0	0	2.79576e-05	0	0	0	0	0
Bacteria	Cyanobacteria	Melainabacteria	Vampirovibrionales	metagenome	metagenome	0	0	0	0	0	0.000328151	0	8.34808e-05	0	0	0	0
Bacteria	Cyanobacteria	Oxyphotobacteria	Nostocales	Chroococcidiopsaceae	Aliterella CENA595	0	9.68936e-05	0	0	0.00347509	0	0	0	0	0	0	0
Bacteria	Cyanobacteria	Oxyphotobacteria	Nostocales	Chroococcidiopsaceae	uncultured	0	0	0	0	0	0	0	0	9.4779e-05	0	0	0
Bacteria	Cyanobacteria	Oxyphotobacteria	Nostocales	Phormidiaceae	Tychonema CCAP 1459-11B	0	0	0.00025676	0	0	0	0	0	0	0	0	0
Bacteria	Cyanobacteria	Sericytochromatia	metagenome	metagenome	metagenome	0	0	0	0	0	0	0	1.66962e-05	8.12392e-05	0	0	0
Bacteria	Cyanobacteria	Sericytochromatia	uncultured bacterium	uncultured bacterium	uncultured bacterium	0	0	0	0	0	0	0	1.66962e-05	5.41594e-05	0	0	0
Bacteria	Deinococcus-Thermus	Deinococci	Deinococcales	Trueperaceae	Truepera	0	0	0	0	0.0075223	0	5.59151e-05	5.00885e-05	0	0	0	0.00754292
Bacteria	Dependentiae	Babeliae	Babeliales	UBA12409	uncultured Verrucomicrobia bacterium	0	0	0	0	0	0	4.19363e-05	0	0	0	0	0
Bacteria	Dependentiae	Babeliae	Babeliales	Vermiphilaceae	uncultured bacterium	0	0	0	0	0	0.00110751	0	0.000400708	0	0	0	0
Bacteria	Entotheonellaeota	Entotheonellia	Entotheonellales	Entotheonellaceae	uncultured bacterium	0	5.81362e-05	0	0	0	0	0	0	0	0	0	0
Bacteria	Epsilonbacteraeota	Campylobacteria	Campylobacterales	Sulfurovaceae	Sulfurovum	2.03413e-05	0	0	0.00430028	0.00355985	0	0	1.66962e-05	0	0.00159108	0.00345658	0
Bacteria	FBP	Ambiguous_taxa	Ambiguous_taxa	Ambiguous_taxa	Ambiguous_taxa	0.000223755	0.000542604	0	0	0	0	0.000265597	0.000467493	0.000582214	0	0	0
Bacteria	FBP	uncultured bacterium	uncultured bacterium	uncultured bacterium	uncultured bacterium	0	0	0	0	0	0	0	6.67847e-05	0.000176018	0	0	0
Bacteria	Firmicutes	Bacilli	Bacillales	Ambiguous_taxa	Ambiguous_taxa	0	0	1.60475e-05	0	4.23792e-05	8.20378e-05	0	0	0	9.35926e-05	7.85587e-05	8.44357e-05
Bacteria	Firmicutes	Bacilli	Bacillales	Bacillaceae	Ambiguous_taxa	0	0	0	4.2437e-05	0	0	0	0	0	0	0	0
Bacteria	Firmicutes	Bacilli	Bacillales	Bacillaceae	Bacillus	0.000101707	0	0	0.0169041	0	8.20378e-05	0	0	0.000189558	0.00175954	0	0.00223755
Bacteria	Firmicutes	Bacilli	Bacillales	Listeriaceae	Brochothrix	0.00461748	0.000329438	0.00600177	0.00775183	0.032081	0.0430904	0.000433342	0.000133569	5.41594e-05	0.0199727	0.0537865	0.028497
Bacteria	Firmicutes	Bacilli	Bacillales	Paenibacillaceae	Cohnella	0	0	0	0	0	0	0	1.66962e-05	4.06196e-05	0	0	0
Bacteria	Firmicutes	Bacilli	Bacillales	Paenibacillaceae	Paenibacillus	0	0	0.000304903	0	0	0	0	6.67847e-05	0.000121859	0	0	0
Bacteria	Firmicutes	Bacilli	Bacillales	Planococcaceae	Ambiguous_taxa	0	0	0	0.0044276	0	0	0	0	5.41594e-05	0.00250828	0	0
Bacteria	Firmicutes	Bacilli	Bacillales	Planococcaceae	Bhargavaea	0.000183072	0	0	0.00223502	0	0.000902416	0	0	0	0	0	0
Bacteria	Firmicutes	Bacilli	Bacillales	Planococcaceae	Solibacillus	0	0	0	9.90197e-05	0	0	0	0	0	0	0	0
Bacteria	Firmicutes	Bacilli	Bacillales	Planococcaceae	Sporosarcina	0	0	0	0.000282913	0	0	0	0	0	0.000149748	0	0
Bacteria	Firmicutes	Bacilli	Bacillales	Staphylococcaceae	S31	0	0	0	0	0	0	0	0	0	0.000486682	0	0
Bacteria	Firmicutes	Bacilli	Bacillales	Staphylococcaceae	Staphylococcus	0.00158662	0.00102707	0.00561663	0.0130565	0.0230966	0.0212068	0.000489257	6.67847e-05	0.000176018	0.033918	0.0112077	0.0517872
Bacteria	Firmicutes	Bacilli	Lactobacillales	Ambiguous_taxa	Ambiguous_taxa	0	0	0	0	0	0	0	0	0	0	0.00306379	0
Bacteria	Firmicutes	Bacilli	Lactobacillales	Aerococcaceae	Facklamia	0	0	0	0	0	0.000799869	0	0	0	0	0	0
Bacteria	Firmicutes	Bacilli	Lactobacillales	Carnobacteriaceae	Atopococcus	0	0	0.00012838	0	0	0	0	0	0	0	0	0
Bacteria	Firmicutes	Bacilli	Lactobacillales	Carnobacteriaceae	Atopostipes	0	0	0	0.00306961	0	0	0	0	0	0	0	0
Bacteria	Firmicutes	Bacilli	Lactobacillales	Carnobacteriaceae	Carnobacterium	0	0	0	0	0	0.00200993	5.59151e-05	1.66962e-05	0	0.00164723	0	1.40726e-05
Bacteria	Firmicutes	Bacilli	Lactobacillales	Enterococcaceae	Ambiguous_taxa	0	0	0	0	0.000614498	0	0	0	0	0	0	0
Bacteria	Firmicutes	Bacilli	Lactobacillales	Enterococcaceae	Enterococcus	0	0	0	0	0.00572119	0	1.39788e-05	0	0	0	0	0
Bacteria	Firmicutes	Bacilli	Lactobacillales	Enterococcaceae	Vagococcus	0	0	0.000545615	0	0.000444981	0	6.98939e-05	0	0	0.00215263	0.015895	0
Bacteria	Firmicutes	Bacilli	Lactobacillales	Lactobacillaceae	Lactobacillus	0.000264437	0	0	0.0140608	0	0.00324049	5.59151e-05	5.00885e-05	0	0	0.0290405	0.0054461
Bacteria	Firmicutes	Bacilli	Lactobacillales	Leuconostocaceae	Leuconostoc	0.00105775	1.93787e-05	0.000224665	0	0	0.00461463	0.000181724	3.33923e-05	0	0.00293881	0.0055253	0.0047284
Bacteria	Firmicutes	Bacilli	Lactobacillales	Streptococcaceae	Lactococcus	0.000223755	0.000135651	0.00096285	0	0	0.00383527	0.000139788	1.66962e-05	0	0.00578403	0.013224	0
Bacteria	Firmicutes	Bacilli	Lactobacillales	Streptococcaceae	Streptococcus	0.00105775	0	0.00083447	0.00240476	0.00266989	0.00494278	0.00022366	1.66962e-05	0.000108319	0.0105573	2.61862e-05	0.00347594
Bacteria	Firmicutes	Clostridia	Clostridiales	Clostridiaceae 1	Clostridium sensu stricto 1	0	0	0	0	0	0	4.19363e-05	0	0	0	0	0
Bacteria	Firmicutes	Clostridia	Clostridiales	Clostridiaceae 1	Clostridium sensu stricto 12	0	0	0	0	0.00394126	0	0	0	1.35399e-05	0	0	0
Bacteria	Firmicutes	Clostridia	Clostridiales	Clostridiales vadinBB60 group	uncultured bacterium	0	0	0	0	0	0.000676812	0	0	0	0	0	0
Bacteria	Firmicutes	Clostridia	Clostridiales	Family XI	Finegoldia	4.06827e-05	0.000368196	0	0	0	0	0	0	0	0	0.00720122	1.40726e-05
Bacteria	Firmicutes	Clostridia	Clostridiales	Family XI	Peptoniphilus	0	0	0	0	0	0.00321998	0	0	0	0.00116055	0.00167592	0
Bacteria	Firmicutes	Clostridia	Clostridiales	Heliobacteriaceae	Hydrogenispora	0	0	0	0	0	0	0	0	2.70797e-05	0	0	0
Bacteria	Firmicutes	Clostridia	Clostridiales	Peptococcaceae	Desulfitobacterium	0	0	0	0	0	0	0	0	0	0.00398705	0	0
Bacteria	Firmicutes	Clostridia	Clostridiales	Peptococcaceae	Desulfurispora	0	0	0	0.00519146	0	0	0	0	0	0	0	0
Bacteria	Firmicutes	Clostridia	Clostridiales	Peptostreptococcaceae	Clostridioides	0	0	0	0	0.00281821	0	0	0	0	0	0	0
Bacteria	Firmicutes	Clostridia	Clostridiales	Ruminococcaceae	Caproiciproducens	0	0	0	0	0	0	0	0	0	0.000149748	0	0
Bacteria	Firmicutes	Clostridia	Clostridiales	Ruminococcaceae	Ruminiclostridium 5	0	0.000116272	0	0	0	0	0	0	0	0	0	0
Bacteria	Firmicutes	Erysipelotrichia	Erysipelotrichales	Erysipelotrichaceae	Catenibacterium	0	0	0	0	0	0.00073834	0	0	0	0	0	0
Bacteria	Firmicutes	Negativicutes	Selenomonadales	Acidaminococcaceae	uncultured	0.000101707	0	0	0	0	0	0	0	0	0	0	0
Bacteria	Firmicutes	Negativicutes	Selenomonadales	Veillonellaceae	Anaerospora	0	0	0	0	0	0	0	0	2.70797e-05	0	0	0
Bacteria	Firmicutes	Negativicutes	Selenomonadales	Veillonellaceae	Megasphaera	0	0	0	0	0.0032632	0	0	0	0	0	0	0
Bacteria	Firmicutes	Negativicutes	Selenomonadales	Veillonellaceae	Veillonella	0.000244096	0	0	0	0	0	0	0	0	0	0	0
Bacteria	Fusobacteria	Fusobacteriia	Fusobacteriales	Leptotrichiaceae	Leptotrichia	0.000101707	0	0	0	0	0	0	0	0	0	0	0
Bacteria	Gemmatimonadetes	Gemmatimonadetes	Gemmatimonadales	Gemmatimonadaceae	Gemmatimonas	0	0.000116272	0.000208618	0	0	0	0	3.33923e-05	8.12392e-05	0	0	0.000745849
Bacteria	Gemmatimonadetes	Gemmatimonadetes	Gemmatimonadales	Gemmatimonadaceae	uncultured	4.06827e-05	1.93787e-05	0	0	0	0	2.79576e-05	8.34808e-05	4.06196e-05	0	0	0
Bacteria	Patescibacteria	Parcubacteria	Candidatus Kaiserbacteria	uncultured bacterium	uncultured bacterium	0	0	0	0	0	0	0	0	8.12392e-05	0	0	0
Bacteria	Patescibacteria	Parcubacteria	Candidatus Nomurabacteria	uncultured bacterium	uncultured bacterium	0	0	0	0	0	0	0.00011183	0	5.41594e-05	0	0	0
Bacteria	Patescibacteria	Parcubacteria	Candidatus Nomurabacteria	uncultured soil bacterium	uncultured soil bacterium	0	1.93787e-05	0	0	0	0	4.19363e-05	0	0	0	0	0
Bacteria	Patescibacteria	Saccharimonadia	Saccharimonadales	Ambiguous_taxa	Ambiguous_taxa	0.00705844	0.00261613	0.025002	0.00861471	0.00226729	0.00399934	0.000139788	0.000350619	0.000148938	0.00327574	0.0022782	0.00676893
Bacteria	Patescibacteria	Saccharimonadia	Saccharimonadales	Saccharimonadaceae	Candidatus Saccharibacteria bacterium RAAC3_TM7_1	0.0120014	0.00561983	0.00471797	0	0	0.000205095	0.00155164	0.00916619	0.00908525	9.35926e-05	0	0
Bacteria	Patescibacteria	Saccharimonadia	Saccharimonadales	Saccharimonadaceae	uncultured bacterium	0.00201379	0.00102707	0.00121961	0	0.0169517	0.00832684	0.000181724	0.0017197	0.00148938	0	0	0
Bacteria	Patescibacteria	Saccharimonadia	Saccharimonadales	metagenome	metagenome	0	0	0	0	0.00281821	0	4.19363e-05	1.66962e-05	9.4779e-05	0	0	0
Bacteria	Patescibacteria	Saccharimonadia	Saccharimonadales	uncultured Candidatus Saccharibacteria bacterium	uncultured Candidatus Saccharibacteria bacterium	4.06827e-05	0.000329438	0	1.41457e-05	2.11896e-05	2.05095e-05	0.000643024	0.000500885	0.000541594	0.00209648	0.00219964	0.00318041
Bacteria	Patescibacteria	Saccharimonadia	Saccharimonadales	uncultured Sphingobium sp,	uncultured Sphingobium sp,	0	0	0	0	0	0	2.79576e-05	3.33923e-05	1.35399e-05	0	0	0
Bacteria	Patescibacteria	Saccharimonadia	Saccharimonadales	uncultured bacterium	uncultured bacterium	0.000630581	0.000581362	0.00494263	1.41457e-05	0.000381412	0.00205095	0.00170541	0.00212041	0.00154354	0.000355652	7.85587e-05	0.000562905
Bacteria	Patescibacteria	Saccharimonadia	Saccharimonadales	uncultured bacterium SBR2096	uncultured bacterium SBR2096	0	0	0	0	0	0	0.00159358	0.00065115	0.00116443	0	0	0
Bacteria	Patescibacteria	Saccharimonadia	Saccharimonadales	uncultured soil bacterium	uncultured soil bacterium	0	0.000213166	0	0	0	0	2.79576e-05	0.000100177	6.76993e-05	0	0	0
Bacteria	Patescibacteria	WS6 (Dojkabacteria)	uncultured bacterium	uncultured bacterium	uncultured bacterium	0	0	0	0.000353642	0	0	0	0	0	0	0	0
Bacteria	Planctomycetes	Brocadiae	Brocadiales	Brocadiaceae	Candidatus Brocadia	0	0	0	0	0	0	0	5.00885e-05	0	0.00134773	0	0
Bacteria	Planctomycetes	Brocadiae	Brocadiales	Brocadiaceae	Candidatus Jettenia	0	0	0	0	0	0	0	0	0	0.00134773	0	0
Bacteria	Planctomycetes	Phycisphaerae	CCM11a	Ambiguous_taxa	Ambiguous_taxa	0	0	0	0	0	0	0	0	0	0	0	8.44357e-05
Bacteria	Planctomycetes	Phycisphaerae	Tepidisphaerales	Tepidisphaeraceae	Tepidisphaera	0	0	0	0	0	0	5.59151e-05	0.000133569	0.000473895	0	0	0
Bacteria	Planctomycetes	Phycisphaerae	Tepidisphaerales	Tepidisphaeraceae	uncultured planctomycete	0	0	0	0	0	0	9.78515e-05	1.66962e-05	9.4779e-05	0	0	0
Bacteria	Planctomycetes	Phycisphaerae	Tepidisphaerales	WD2101 soil group	Ambiguous_taxa	0	0	0	0	0	0	1.39788e-05	6.67847e-05	0.000135399	0	0	0
Bacteria	Planctomycetes	Phycisphaerae	Tepidisphaerales	WD2101 soil group	Planctomycetales bacterium Ellin6207	0	0	0	0	0	0	0	5.00885e-05	1.35399e-05	0	0	0
Bacteria	Planctomycetes	Phycisphaerae	Tepidisphaerales	WD2101 soil group	uncultured bacterium	0	0	0	0	0	0.00168178	0.00022366	8.34808e-05	0.000446815	0	0	0
Bacteria	Planctomycetes	Planctomycetacia	Gemmatales	Gemmataceae	Gemmata	0	0	0.000561663	0	0	0	6.98939e-05	3.33923e-05	0.000135399	0	0	0
Bacteria	Planctomycetes	Planctomycetacia	Gemmatales	Gemmataceae	uncultured	0	0	0	0.00295645	0	0	0	0	0	0	0	0
Bacteria	Planctomycetes	Planctomycetacia	Isosphaerales	Isosphaeraceae	Ambiguous_taxa	0	0.000213166	0.00012838	0.00465393	0	2.05095e-05	0.000601088	0.000350619	0.000568674	0	0.00240913	0
Bacteria	Planctomycetes	Planctomycetacia	Isosphaerales	Isosphaeraceae	Aquisphaera	0	0	0.00025676	0	0	0	2.79576e-05	0.000183658	0.000176018	0	0	0
Bacteria	Planctomycetes	Planctomycetacia	Isosphaerales	Isosphaeraceae	Isosphaera	0	0	0	2.82913e-05	0	0	0	0	0	0	2.61862e-05	0
Bacteria	Planctomycetes	Planctomycetacia	Isosphaerales	Isosphaeraceae	Paludisphaera	0	0	0	0	0	0	1.39788e-05	0.000116873	4.06196e-05	0	0	0
Bacteria	Planctomycetes	Planctomycetacia	Isosphaerales	Isosphaeraceae	Singulisphaera	6.1024e-05	0	0.000690043	0	0	0	0.00272586	0.000951681	0.00163832	0	0	0
Bacteria	Planctomycetes	Planctomycetacia	Isosphaerales	Isosphaeraceae	uncultured	0	0	0.000240713	5.65827e-05	0	0	1.39788e-05	3.33923e-05	0	0	5.23725e-05	0
Bacteria	Planctomycetes	Planctomycetacia	Pirellulales	Pirellulaceae	Pir4 lineage	0.000488192	0.00015503	0.000609805	0	0	0	0	0	5.41594e-05	0	0	0
Bacteria	Planctomycetes	Planctomycetacia	Pirellulales	Pirellulaceae	Pirellula	0	0.000213166	0	0	0.00379294	0	0	0	0	0	0	0
Bacteria	Planctomycetes	Planctomycetacia	Pirellulales	Pirellulaceae	uncultured	0	3.87574e-05	8.02375e-05	0.000212185	0	0	0	0	0	0	0	0
Bacteria	Planctomycetes	Planctomycetacia	Planctomycetales	Schlesneriaceae	Schlesneria	0	0	6.419e-05	0	0	0	0.000545172	0.00078472	0.000704073	0	0	0
Bacteria	Planctomycetes	Planctomycetacia	Planctomycetales	uncultured	Ambiguous_taxa	0.000183072	0	0	0	0	0	0	0.000150265	0	0	0.000130931	0
Bacteria	Planctomycetes	Planctomycetacia	Planctomycetales	uncultured	metagenome	8.13653e-05	0	0	0	0	0	0	6.67847e-05	2.70797e-05	0	7.85587e-05	0
Bacteria	Planctomycetes	Planctomycetacia	Planctomycetales	uncultured	uncultured bacterium	0	0	0	0	0	0	0	1.66962e-05	0	0	0.00290667	0
Bacteria	Proteobacteria	Alphaproteobacteria	Acetobacterales	Acetobacteraceae	Ambiguous_taxa	4.06827e-05	0.000271302	0	0.00386177	0	0.000779359	0.000167745	6.67847e-05	4.06196e-05	0	0	0
Bacteria	Proteobacteria	Alphaproteobacteria	Acetobacterales	Acetobacteraceae	Acidiphilium	4.06827e-05	9.68936e-05	0	0.00751135	0	0	0.000139788	5.00885e-05	0.000135399	0.00189057	0.00382319	0
Bacteria	Proteobacteria	Alphaproteobacteria	Acetobacterales	Acetobacteraceae	Acidisoma	0.00406827	0.00505785	1.60475e-05	0	0	0.00235859	0.000377427	5.00885e-05	0.000135399	0	0	0
Bacteria	Proteobacteria	Alphaproteobacteria	Acetobacterales	Acetobacteraceae	Acidisphaera	0	0	0	0	0	0	1.39788e-05	0	1.35399e-05	0	0	0
Bacteria	Proteobacteria	Alphaproteobacteria	Acetobacterales	Acetobacteraceae	Acidocella	0.000101707	0	0	0.000707284	0	2.05095e-05	0	1.66962e-05	0.000257257	0.00569043	0.00196397	0
Bacteria	Proteobacteria	Alphaproteobacteria	Acetobacterales	Acetobacteraceae	Endobacter	0	0	0	0	0	0	0	1.66962e-05	1.35399e-05	0	0	0
Bacteria	Proteobacteria	Alphaproteobacteria	Acetobacterales	Acetobacteraceae	Rhodovastum	0	0	0	0	0	0	0.00011183	1.66962e-05	1.35399e-05	0	0	0
Bacteria	Proteobacteria	Alphaproteobacteria	Acetobacterales	Acetobacteraceae	Roseococcus	0	0.000116272	0	0	0	0	1.39788e-05	0.000417404	0.000108319	0	0	0
Bacteria	Proteobacteria	Alphaproteobacteria	Acetobacterales	Acetobacteraceae	Roseomonas	0	0	1.60475e-05	0	0	0	1.39788e-05	0	0	1.87185e-05	0	0.035083
Bacteria	Proteobacteria	Alphaproteobacteria	Acetobacterales	Acetobacteraceae	uncultured	0.000142389	0.00015503	0.00136404	0.0110761	0.0085394	2.05095e-05	0.000489257	0.000200354	0.000704073	0.00608352	0.00429454	0.00558683
Bacteria	Proteobacteria	Alphaproteobacteria	Azospirillales	Azospirillaceae	Skermanella	0	0	0	0	0	0	0.000251618	0	0	0.00217135	0	0
Bacteria	Proteobacteria	Alphaproteobacteria	Azospirillales	Inquilinaceae	Inquilinus	0.00262403	0.000988315	0.000160475	0	0	0.000840888	0.00150971	0.0021872	0.00243718	0	0	0
Bacteria	Proteobacteria	Alphaproteobacteria	Caulobacterales	Caulobacteraceae	Ambiguous_taxa	0	0	0	1.41457e-05	0	0	0.000587109	0.00155274	0.000663453	3.74371e-05	0	0
Bacteria	Proteobacteria	Alphaproteobacteria	Caulobacterales	Caulobacteraceae	Asticcacaulis	0	0	0	0	0	0	0.00152369	0.000985074	0.00181434	0	0	0
Bacteria	Proteobacteria	Alphaproteobacteria	Caulobacterales	Caulobacteraceae	Brevundimonas	0.0055125	0.000368196	0.00280831	0.00212185	0.00275465	0.00426597	0.00011183	0.000317227	0.000257257	0.00175954	0	0
Bacteria	Proteobacteria	Alphaproteobacteria	Caulobacterales	Caulobacteraceae	Caulobacter	0.000752629	0.000116272	0	0	0	0	0	0.000584366	0.000189558	0	0	0
Bacteria	Proteobacteria	Alphaproteobacteria	Caulobacterales	Caulobacteraceae	Phenylobacterium	0.000142389	0.000930178	0	0.00220672	0.00250037	0	0.000363448	0.000734631	0.00105611	0	0	0
Bacteria	Proteobacteria	Alphaproteobacteria	Caulobacterales	Caulobacteraceae	uncultured	0.00144423	0.000193787	8.02375e-05	0.001457	2.11896e-05	2.05095e-05	0.000824748	0.00181988	0.00212576	1.87185e-05	2.61862e-05	0
Bacteria	Proteobacteria	Alphaproteobacteria	Dongiales	Dongiaceae	Dongia	0	0	0	0	0	0	2.79576e-05	1.66962e-05	4.06196e-05	0	0	0
Bacteria	Proteobacteria	Alphaproteobacteria	Elsterales	Elsteraceae	uncultured	0	0	0	0	0	0	2.79576e-05	0	0	0	0	0
Bacteria	Proteobacteria	Alphaproteobacteria	Holosporales	Holosporaceae	uncultured	0	0	0	0.00128726	0	0	0	0	0	0	0	0
Bacteria	Proteobacteria	Alphaproteobacteria	Micavibrionales	Micavibrionaceae	uncultured	0.000183072	0	0	0	0	0	0.000195703	0.00065115	0.000121859	0	0	0
Bacteria	Proteobacteria	Alphaproteobacteria	Micavibrionales	uncultured	uncultured bacterium	0.000162731	0.00112397	0	0	0	0	0	0	0	0	0	0
Bacteria	Proteobacteria	Alphaproteobacteria	Micropepsales	Micropepsaceae	uncultured	0.00345803	0.00935992	0.00282436	0.00342325	2.11896e-05	0.00330202	0.0156423	0.0162287	0.0185902	0.00263931	0	1.40726e-05
Bacteria	Proteobacteria	Alphaproteobacteria	Micropepsales	Micropepsaceae	uncultured Methylocystaceae bacterium	0	0.000387574	0	0	0	0	0.000307533	0.000200354	0.000324957	0	0	0
Bacteria	Proteobacteria	Alphaproteobacteria	Paracaedibacterales	Paracaedibacteraceae	Ambiguous_taxa	0	0	0.000930755	0	0	0	0	0	0	0	0	0
Bacteria	Proteobacteria	Alphaproteobacteria	Paracaedibacterales	Paracaedibacteraceae	Candidatus Finniella	0	0	0	0	0	0	0	0	2.70797e-05	0	0	0
Bacteria	Proteobacteria	Alphaproteobacteria	Paracaedibacterales	Paracaedibacteraceae	Candidatus Paracaedibacter	0	0	0	0	0	0	0	3.33923e-05	0	0	0	0
Bacteria	Proteobacteria	Alphaproteobacteria	Paracaedibacterales	Paracaedibacteraceae	uncultured	0	0	0	0	0	0	6.98939e-05	0.000166962	5.41594e-05	0	0	0
Bacteria	Proteobacteria	Alphaproteobacteria	Parvibaculales	Parvibaculaceae	Parvibaculum	0	0	0	0	0	0	0	0	0	0.000935926	0	0
Bacteria	Proteobacteria	Alphaproteobacteria	Reyranellales	Reyranellaceae	Reyranella	0	0.000329438	0.00117147	0.00906738	0	0	0.00068496	0.000350619	0.000595754	0	0.00382319	0
Bacteria	Proteobacteria	Alphaproteobacteria	Rhizobiales	Beijerinckiaceae	Ambiguous_taxa	0	0	0.000288855	0	0	0	5.59151e-05	0	6.76993e-05	0	0	0
Bacteria	Proteobacteria	Alphaproteobacteria	Rhizobiales	Beijerinckiaceae	1174-901-12	0.0131608	0.00662752	0.057434	0	0	0.0153206	0.0434181	0.0172471	0.030072	0.000861052	2.61862e-05	0.00505207
Bacteria	Proteobacteria	Alphaproteobacteria	Rhizobiales	Beijerinckiaceae	Bosea	0.000122048	0	0.00215037	1.41457e-05	0.00974721	0.00135362	0.000824748	0.0004341	0.000108319	0	0.00489683	0
Bacteria	Proteobacteria	Alphaproteobacteria	Rhizobiales	Beijerinckiaceae	Methylobacterium	0.000325461	0.000620119	0.00112333	0	0	0.00180483	8.38727e-05	0.000200354	0.000121859	0	0	0
Bacteria	Proteobacteria	Alphaproteobacteria	Rhizobiales	Beijerinckiaceae	Methylocella	0	0.000135651	9.6285e-05	1.41457e-05	0	0	6.98939e-05	0.000100177	0.000162478	0	0	0
Bacteria	Proteobacteria	Alphaproteobacteria	Rhizobiales	Beijerinckiaceae	Methylorosula	0.000284779	0.000658876	0	0	0	0	0.000167745	0.000300531	0.000148938	0	0	0
Bacteria	Proteobacteria	Alphaproteobacteria	Rhizobiales	Beijerinckiaceae	Methylovirgula	0.000203413	0	0	0	0	0	6.98939e-05	0.000183658	2.70797e-05	0	0	0
Bacteria	Proteobacteria	Alphaproteobacteria	Rhizobiales	Beijerinckiaceae	Roseiarcus	0	0	0	0	0	0	5.59151e-05	3.33923e-05	2.70797e-05	0	0	0
Bacteria	Proteobacteria	Alphaproteobacteria	Rhizobiales	Beijerinckiaceae	alphaI cluster	0.000386485	0	0	0	0	0	0.000587109	0.000601062	5.41594e-05	0	0	0
Bacteria	Proteobacteria	Alphaproteobacteria	Rhizobiales	Beijerinckiaceae	metagenome	0.00268506	0.00133713	0.0340047	0.00357886	0	4.10189e-05	0.00606679	0.00345611	0.00622834	1.87185e-05	0	0
Bacteria	Proteobacteria	Alphaproteobacteria	Rhizobiales	Beijerinckiaceae	uncultured	0.00518704	0.0024611	0.0595041	0.00587045	0	0.00073834	0.0110992	0.00599392	0.0102903	0	0	0
Bacteria	Proteobacteria	Alphaproteobacteria	Rhizobiales	C2U	uncultured bacterium	0	0	0	0	0	0	0	0	0	0	0	0.000154799
Bacteria	Proteobacteria	Alphaproteobacteria	Rhizobiales	Devosiaceae	Ambiguous_taxa	0.00445475	0.00189911	0.00229479	0.0171587	0.0290509	0.0197301	0.011197	0.00763015	0.0107506	0.00159108	0	1.40726e-05
Bacteria	Proteobacteria	Alphaproteobacteria	Rhizobiales	Devosiaceae	Arsenicitalea	2.03413e-05	0	0	4.2437e-05	0.00252156	0.000984454	0	5.00885e-05	2.70797e-05	0	0	0
Bacteria	Proteobacteria	Alphaproteobacteria	Rhizobiales	Devosiaceae	Devosia	0.000549216	5.81362e-05	0.00102704	0.00810547	0.00777658	0.00367119	0.000894642	0.00183658	0.00190912	1.87185e-05	0	0
Bacteria	Proteobacteria	Alphaproteobacteria	Rhizobiales	Devosiaceae	uncultured	0.000386485	0.000348817	4.81425e-05	0.000396079	2.11896e-05	0.000164076	0.000768833	0.000534277	0.00094779	0.000336934	0	0
Bacteria	Proteobacteria	Alphaproteobacteria	Rhizobiales	Hyphomicrobiaceae	Hyphomicrobium	0.00077297	0	0	0	0.00794609	0	0	1.66962e-05	0	0	0	0
Bacteria	Proteobacteria	Alphaproteobacteria	Rhizobiales	Hyphomicrobiaceae	Pedomicrobium	0	1.93787e-05	0	0.00200869	0	0.00131261	0	0	0	0	0.00348277	0
Bacteria	Proteobacteria	Alphaproteobacteria	Rhizobiales	Hyphomicrobiaceae	uncultured	0	0	0	0	0	0	0	0	0	1.87185e-05	2.61862e-05	0
Bacteria	Proteobacteria	Alphaproteobacteria	Rhizobiales	Kaistiaceae	Kaistia	0	0	0	0	0	0	0	0	2.70797e-05	0	0	0
Bacteria	Proteobacteria	Alphaproteobacteria	Rhizobiales	Labraceae	Labrys	0.00386485	0.000891421	0.0321271	0.0319126	0	0.00842939	0.00705928	0.00290513	0.00250487	0.00219007	2.61862e-05	0.00243456
Bacteria	Proteobacteria	Alphaproteobacteria	Rhizobiales	Methyloligellaceae	Ambiguous_taxa	0	0	0	0	0	0	2.79576e-05	3.33923e-05	0	0	0	0
Bacteria	Proteobacteria	Alphaproteobacteria	Rhizobiales	Methyloligellaceae	uncultured	0	0	0	0	0	0	1.39788e-05	1.66962e-05	0	0	0	0
Bacteria	Proteobacteria	Alphaproteobacteria	Rhizobiales	Rhizobiaceae	Ambiguous_taxa	0.000244096	0.000445711	0.00176523	0.00275841	0.000296654	0.000184585	0.000265597	0.000150265	9.4779e-05	3.74371e-05	0.000104745	0.000225162
Bacteria	Proteobacteria	Alphaproteobacteria	Rhizobiales	Rhizobiaceae	Allorhizobium-Neorhizobium-Pararhizobium-Rhizobium	0.0169443	0.00596865	0.0917436	0.0361422	0.0793126	0.185262	0.0596335	0.0247437	0.0387917	0.0848698	0.0548602	0.0737686
Bacteria	Proteobacteria	Alphaproteobacteria	Rhizobiales	Rhizobiaceae	Aminobacter	2.03413e-05	0	1.60475e-05	7.07284e-05	0	0	0	0	0	0	0	0
Bacteria	Proteobacteria	Alphaproteobacteria	Rhizobiales	Rhizobiaceae	Aquamicrobium	0	0	0.000224665	0	8.47583e-05	0	0	3.33923e-05	0	0	0	0
Bacteria	Proteobacteria	Alphaproteobacteria	Rhizobiales	Rhizobiaceae	Ensifer	0	0	0	0	0	0.000410189	0	0	0	0	0	0
Bacteria	Proteobacteria	Alphaproteobacteria	Rhizobiales	Rhizobiaceae	Mesorhizobium	0.00431236	0.0011821	0.00457354	0.0091664	0.012968	0.00125108	0.0036904	0.00230407	0.00230178	0.000954645	2.61862e-05	0.00820433
Bacteria	Proteobacteria	Alphaproteobacteria	Rhizobiales	Rhizobiaceae	Neorhizobium	0	0	0.00102704	0	0.00351747	0.00112802	2.79576e-05	0	1.35399e-05	0	2.61862e-05	0
Bacteria	Proteobacteria	Alphaproteobacteria	Rhizobiales	Rhizobiaceae	Ochrobactrum	0	0	0	2.82913e-05	0	0.000143566	1.39788e-05	3.33923e-05	1.35399e-05	0	0	0
Bacteria	Proteobacteria	Alphaproteobacteria	Rhizobiales	Rhizobiaceae	Paramesorhizobium	0	0	0	0.00782256	0	0	0	0	0	0	0	0
Bacteria	Proteobacteria	Alphaproteobacteria	Rhizobiales	Rhizobiaceae	Phyllobacterium	0	0.000213166	0	1.41457e-05	0	0.00178432	0	1.66962e-05	0	0	0	0
Bacteria	Proteobacteria	Alphaproteobacteria	Rhizobiales	Rhizobiaceae	Shinella	0	0	0	4.2437e-05	0	6.15284e-05	0	0	0	0	0	0
Bacteria	Proteobacteria	Alphaproteobacteria	Rhizobiales	Rhizobiaceae	uncultured	0	0	0	0.00256037	2.11896e-05	0.00198942	0	5.00885e-05	4.06196e-05	0	0	0
Bacteria	Proteobacteria	Alphaproteobacteria	Rhizobiales	Rhizobiales Incertae Sedis	uncultured	0	0	0	0	0	0	5.59151e-05	0	1.35399e-05	0	0	0
Bacteria	Proteobacteria	Alphaproteobacteria	Rhizobiales	Stappiaceae	Stappia	0	0	0	1.41457e-05	0	0.000102547	2.79576e-05	0	4.06196e-05	0	0	1.40726e-05
Bacteria	Proteobacteria	Alphaproteobacteria	Rhizobiales	Xanthobacteraceae	Ambiguous_taxa	0.0900307	0.0710811	0.0265586	0.0415458	0.0145996	0.0363428	0.0128046	0.0187498	0.015801	0.0150123	0.0114172	0.0168449
Bacteria	Proteobacteria	Alphaproteobacteria	Rhizobiales	Xanthobacteraceae	Afipia	0.00571591	0.00414705	0.0171387	0.0394664	0.0540122	0.0317076	0.0229532	0.0100344	0.0126192	0.00473579	2.61862e-05	0.00536167
Bacteria	Proteobacteria	Alphaproteobacteria	Rhizobiales	Xanthobacteraceae	Azorhizobium	0	0	0	0	0.000402602	0	0	0	0	0	0	0
Bacteria	Proteobacteria	Alphaproteobacteria	Rhizobiales	Xanthobacteraceae	Bradyrhizobium	0.000223755	0.000561983	0.00157266	0.00140042	0.00156803	0.00123057	0.000740875	0.000584366	0.000514515	0.000374371	2.61862e-05	0.000576977
Bacteria	Proteobacteria	Alphaproteobacteria	Rhizobiales	Xanthobacteraceae	GAS113	0	0	0	0	0	0	0	1.66962e-05	4.06196e-05	0	0	0
Bacteria	Proteobacteria	Alphaproteobacteria	Rhizobiales	Xanthobacteraceae	Nitrobacter	0	0	3.2095e-05	9.90197e-05	0.000169517	0.000143566	1.39788e-05	1.66962e-05	4.06196e-05	3.74371e-05	0	1.40726e-05
Bacteria	Proteobacteria	Alphaproteobacteria	Rhizobiales	Xanthobacteraceae	Pseudolabrys	0.000183072	0.000406953	4.81425e-05	0	0	0.000615284	4.19363e-05	6.67847e-05	6.76993e-05	0	0	0
Bacteria	Proteobacteria	Alphaproteobacteria	Rhizobiales	Xanthobacteraceae	Pseudorhodoplanes	0.000122048	0	0.000288855	0	0	0	0	0	0	0	0	0
Bacteria	Proteobacteria	Alphaproteobacteria	Rhizobiales	Xanthobacteraceae	Rhodoplanes	0	0	0.000240713	0	0	0	0	0	0	0	0.00062847	0
Bacteria	Proteobacteria	Alphaproteobacteria	Rhizobiales	Xanthobacteraceae	Rhodopseudomonas	0.00168833	0.000523225	0.00369093	0.0027867	0.000826394	0.00432749	0.00455708	0.00207032	0.00177372	0.0112686	0.00769875	0.0271039
Bacteria	Proteobacteria	Alphaproteobacteria	Rhizobiales	Xanthobacteraceae	Xanthobacter	0	0	0	0	0.00247918	0	0	0	0	0	0	0
Bacteria	Proteobacteria	Alphaproteobacteria	Rhizobiales	Xanthobacteraceae	uncultured	0.000345803	0	0.000353045	0.00700211	0	0.000902416	0	0	0	0	0	0
Bacteria	Proteobacteria	Alphaproteobacteria	Rhodobacterales	Rhodobacteraceae	Defluviimonas	0	0	0	0	0	0	0	0	1.35399e-05	0	5.23725e-05	4.22178e-05
Bacteria	Proteobacteria	Alphaproteobacteria	Rhodobacterales	Rhodobacteraceae	HIMB11	0.000650922	3.87574e-05	0.000529568	0	0	0.000410189	0	0	0.000595754	0	0.00314235	0.00256122
Bacteria	Proteobacteria	Alphaproteobacteria	Rhodobacterales	Rhodobacteraceae	Paracoccus	0	0.00060074	0.00025676	0	0.000402602	0.00250215	0	0	0.000135399	0	0.000288049	0.000197017
Bacteria	Proteobacteria	Alphaproteobacteria	Rhodobacterales	Rhodobacteraceae	Rhodobacter	0	0	0	0	0.000635687	0	0	0	0	0	0	0
Bacteria	Proteobacteria	Alphaproteobacteria	Rhodobacterales	Rhodobacteraceae	Rhodobaculum	0	0	8.02375e-05	0	0	0	0	0	0	0	0	0
Bacteria	Proteobacteria	Alphaproteobacteria	Rhodobacterales	Rhodobacteraceae	Rubellimicrobium	4.06827e-05	1.93787e-05	3.2095e-05	1.41457e-05	0	0	0	0	0	1.87185e-05	0	0.0718548
Bacteria	Proteobacteria	Alphaproteobacteria	Rhodospirillales	Magnetospirillaceae	Telmatospirillum	0	0	0	0	0	0	8.38727e-05	0	9.4779e-05	3.74371e-05	0	0
Bacteria	Proteobacteria	Alphaproteobacteria	Rhodospirillales	Magnetospirillaceae	uncultured	0	0	0	0	0	0	0.00244629	0.000801416	0.00505037	0.00411808	0	0
Bacteria	Proteobacteria	Alphaproteobacteria	Rhodospirillales	Rhodospirillaceae	uncultured	0	0	0	0	0	0	8.38727e-05	1.66962e-05	6.76993e-05	0	0	0
Bacteria	Proteobacteria	Alphaproteobacteria	Rhodospirillales	uncultured	metagenome	0	0	0	0	0	0	2.79576e-05	0.00113534	0.000176018	0	0	0
Bacteria	Proteobacteria	Alphaproteobacteria	Rhodospirillales	uncultured	uncultured bacterium	0.000833994	0.0021898	0	0	0	0	5.59151e-05	0.00078472	0.000731153	0	0	0
Bacteria	Proteobacteria	Alphaproteobacteria	Rickettsiales	AB1	uncultured bacterium	0	0	0	0	0	0	0	6.67847e-05	0.000324957	0	0	0
Bacteria	Proteobacteria	Alphaproteobacteria	Rickettsiales	Anaplasmataceae	Wolbachia	0	0	0	0.000806303	0.000762825	0.00135362	0	1.66962e-05	0	0	0	0
Bacteria	Proteobacteria	Alphaproteobacteria	Rickettsiales	Rickettsiaceae	Candidatus Megaira	0	0	0	0	0	0	1.39788e-05	1.66962e-05	0	0	0	0
Bacteria	Proteobacteria	Alphaproteobacteria	Rickettsiales	SM2D12	Ambiguous_taxa	0	0.000329438	0	0	0	0	0.000167745	5.00885e-05	0.000162478	0	0	0
Bacteria	Proteobacteria	Alphaproteobacteria	Rickettsiales	SM2D12	metagenome	0.000223755	0.000968936	0	0	0	0	0.00149573	0.00646142	0.00242364	1.87185e-05	0	0
Bacteria	Proteobacteria	Alphaproteobacteria	Rickettsiales	SM2D12	uncultured bacterium	4.06827e-05	0.000406953	0	0	0	0	0.000475279	0.00178649	0.000717613	0	0	0
Bacteria	Proteobacteria	Alphaproteobacteria	Sphingomonadales	Sphingomonadaceae	Ambiguous_taxa	2.03413e-05	0	1.60475e-05	0	0	0	0.000195703	0.000133569	0.000324957	1.87185e-05	0	0.000182944
Bacteria	Proteobacteria	Alphaproteobacteria	Sphingomonadales	Sphingomonadaceae	Altererythrobacter	0	0	0	0.00338082	0	2.05095e-05	0	0	0	0	0	0
Bacteria	Proteobacteria	Alphaproteobacteria	Sphingomonadales	Sphingomonadaceae	Blastomonas	0	0	0	0	0	0	0.000153767	0.000333923	6.76993e-05	0	0	0
Bacteria	Proteobacteria	Alphaproteobacteria	Sphingomonadales	Sphingomonadaceae	Croceicoccus	0	0	0	0	0	0	1.39788e-05	8.34808e-05	2.70797e-05	0	0	0
Bacteria	Proteobacteria	Alphaproteobacteria	Sphingomonadales	Sphingomonadaceae	Ellin6055	0	0	0	0	0	0	0	0	0	0	0	2.81452e-05
Bacteria	Proteobacteria	Alphaproteobacteria	Sphingomonadales	Sphingomonadaceae	Novosphingobium	0	0	0	0	0	0	0.000587109	0.000150265	0.00140815	0	0	0
Bacteria	Proteobacteria	Alphaproteobacteria	Sphingomonadales	Sphingomonadaceae	Rhizorhapis	0	0	0	0	0	0	0	3.33923e-05	0	0	0	0
Bacteria	Proteobacteria	Alphaproteobacteria	Sphingomonadales	Sphingomonadaceae	Sphingoaurantiacus	6.1024e-05	3.87574e-05	0.00044933	0	0	0.000102547	5.59151e-05	1.66962e-05	5.41594e-05	0	0	0
Bacteria	Proteobacteria	Alphaproteobacteria	Sphingomonadales	Sphingomonadaceae	Sphingobium	0	0	0	0	0	0	9.78515e-05	5.00885e-05	0.000135399	0	0	1.40726e-05
Bacteria	Proteobacteria	Alphaproteobacteria	Sphingomonadales	Sphingomonadaceae	Sphingomonas	0.024491	0.0881925	0.0542406	0.0170172	0.0126078	0.0134132	0.0916169	0.0962534	0.0616876	0.00305112	0.00199015	0.0324937
Bacteria	Proteobacteria	Alphaproteobacteria	Sphingomonadales	Sphingomonadaceae	Sphingopyxis	0	0	0	0	0	0	0.000363448	0.000384012	0.000446815	0	0	0
Bacteria	Proteobacteria	Alphaproteobacteria	Sphingomonadales	Sphingomonadaceae	Sphingorhabdus	0	0	0.00120356	0	0	0	0	0	0	0	0	0
Bacteria	Proteobacteria	Alphaproteobacteria	Sphingomonadales	Sphingomonadaceae	uncultured	0.000284779	0	0	0	0	0	0.000265597	0.000150265	0.000176018	0	0	0.000351815
Bacteria	Proteobacteria	Alphaproteobacteria	uncultured	Ambiguous_taxa	Ambiguous_taxa	0	0	0.000208618	0	0	0	0	0	0	0	0	0
Bacteria	Proteobacteria	Deltaproteobacteria	Ambiguous_taxa	Ambiguous_taxa	Ambiguous_taxa	0	0	0	0	0	0	0	0	0	0	0.000916518	0
Bacteria	Proteobacteria	Deltaproteobacteria	Bdellovibrionales	Bacteriovoracaceae	Bacteriovorax	0.000345803	0.000116272	0	0	0	0	0	1.66962e-05	0	0	0	0
Bacteria	Proteobacteria	Deltaproteobacteria	Bdellovibrionales	Bacteriovoracaceae	Peredibacter	0	0	0	0	8.47583e-05	0	0	0	0	0	0	0
Bacteria	Proteobacteria	Deltaproteobacteria	Bdellovibrionales	Bdellovibrionaceae	Bdellovibrio	8.13653e-05	0.000426332	0	0	0	2.05095e-05	0.00294952	0.00113534	0.00185496	0	0.00356133	0
Bacteria	Proteobacteria	Deltaproteobacteria	Desulfovibrionales	Desulfovibrionaceae	Desulfovibrio	0	0	0	0.000226331	0	0	0	0	0	0	0	0
Bacteria	Proteobacteria	Deltaproteobacteria	MBNT15	Ambiguous_taxa	Ambiguous_taxa	0	0	0	0	0	0	0	0	2.70797e-05	0	0	0
Bacteria	Proteobacteria	Deltaproteobacteria	Myxococcales	BIrii41	Ambiguous_taxa	0	0	0	0	0	0	0	5.00885e-05	6.76993e-05	0	0	0
Bacteria	Proteobacteria	Deltaproteobacteria	Myxococcales	Haliangiaceae	Haliangium	0	0	0.00044933	0	0	0.00116904	4.19363e-05	0.000333923	8.12392e-05	0	0	0
Bacteria	Proteobacteria	Deltaproteobacteria	Myxococcales	P3OB-42	Ambiguous_taxa	0	0	0	0	0	0	4.19363e-05	0	0	0	0	0
Bacteria	Proteobacteria	Deltaproteobacteria	Myxococcales	P3OB-42	metagenome	0	0	0	0	0	0	0	3.33923e-05	0	0	0	0
Bacteria	Proteobacteria	Deltaproteobacteria	Myxococcales	Phaselicystidaceae	Phaselicystis	0	0	0	0	0	0	8.38727e-05	0	0	0	0	0
Bacteria	Proteobacteria	Deltaproteobacteria	Myxococcales	Polyangiaceae	Labilithrix	0	0	0	0	0	0	0	5.00885e-05	4.06196e-05	0	0	0
Bacteria	Proteobacteria	Deltaproteobacteria	Myxococcales	Polyangiaceae	Pajaroellobacter	0	0	0.000176523	0.00212185	0	0	1.39788e-05	0.000133569	0.000230178	0	0	0
Bacteria	Proteobacteria	Deltaproteobacteria	Myxococcales	Sandaracinaceae	Sandaracinus	0	0	0.000240713	0	0	0	0	0	0	0	0	0
Bacteria	Proteobacteria	Deltaproteobacteria	Myxococcales	Sandaracinaceae	uncultured	0	0	0	0	0	0.000615284	0	0	0	0	0	0
Bacteria	Proteobacteria	Deltaproteobacteria	Myxococcales	bacteriap25	Ambiguous_taxa	0	0	0	0	0	0	0	0	0	0	0.000183304	0
Bacteria	Proteobacteria	Deltaproteobacteria	Myxococcales	bacteriap25	uncultured bacterium	0	0	0	0.00094776	0	0	0	0	0	0	0.000968891	0
Bacteria	Proteobacteria	Deltaproteobacteria	Myxococcales	mle1-27	Ambiguous_taxa	0	0	0.000144428	0	0	0	0	1.66962e-05	4.06196e-05	0	0	0
Bacteria	Proteobacteria	Deltaproteobacteria	NB1-j	Ambiguous_taxa	Ambiguous_taxa	0	0	0	0	0.00622974	0	0	0	0	0	0	0
Bacteria	Proteobacteria	Deltaproteobacteria	Oligoflexales	0319-6G20	Ambiguous_taxa	0.000244096	0.000406953	0	0	0	0	1.39788e-05	0.00293852	0.000176018	0	0	0
Bacteria	Proteobacteria	Deltaproteobacteria	Oligoflexales	0319-6G20	uncultured bacterium	0.00091536	0.000581362	0	0	0	0	0.000880663	0.00255451	0.000690533	0	0	0
Bacteria	Proteobacteria	Deltaproteobacteria	Oligoflexales	0319-6G20	uncultured delta proteobacterium	0	0	0	0	0	0	9.78515e-05	1.66962e-05	0	0	0	0
Bacteria	Proteobacteria	Deltaproteobacteria	Oligoflexales	Oligoflexaceae	Oligoflexus	0	0	0	0	0	0	0	1.66962e-05	4.06196e-05	0	0	0
Bacteria	Proteobacteria	Deltaproteobacteria	RCP2-54	Ambiguous_taxa	Ambiguous_taxa	0	0	0	0	0	0	0	0	0	0	0.00104745	0
Bacteria	Proteobacteria	Deltaproteobacteria	Syntrophobacterales	Syntrophaceae	Smithella	0	0	0	0	0	0	0	0	0	0.00423039	2.61862e-05	0
Bacteria	Proteobacteria	Gammaproteobacteria	Ambiguous_taxa	Ambiguous_taxa	Ambiguous_taxa	0	0	0	0.00381933	0	0	2.79576e-05	0	0	0	0	0
Bacteria	Proteobacteria	Gammaproteobacteria	Acidithiobacillales	Acidithiobacillaceae	KCM-B-112	0	0.00015503	0	0	0	0	0	0	0	0	0	0
Bacteria	Proteobacteria	Gammaproteobacteria	Aeromonadales	Aeromonadaceae	Aeromonas	0	0	0	0	0	0	0	0	0	0.00117927	0	0
Bacteria	Proteobacteria	Gammaproteobacteria	Alteromonadales	Alteromonadaceae	Rheinheimera	0	0	0	0	0	0	0	0	0	3.74371e-05	0	0
Bacteria	Proteobacteria	Gammaproteobacteria	Alteromonadales	Psychromonadaceae	Psychromonas	0	0	0.000160475	0	0	0.00557857	5.59151e-05	1.66962e-05	0	0.0161167	0	0
Bacteria	Proteobacteria	Gammaproteobacteria	Betaproteobacteriales	Burkholderiaceae	Ambiguous_taxa	0.00604137	0.00631746	0.00319345	0.0123067	0.00898438	0.0137208	0.00652809	0.0102347	0.0106694	0.00441757	0.00020949	0.00564312
Bacteria	Proteobacteria	Gammaproteobacteria	Betaproteobacteriales	Burkholderiaceae	AAP99	0	0	0.000176523	0	0	0	0	0	0	0	0	0
Bacteria	Proteobacteria	Gammaproteobacteria	Betaproteobacteriales	Burkholderiaceae	Achromobacter	0	0	0	0	0	0	0	3.33923e-05	2.70797e-05	0.0018157	0	0
Bacteria	Proteobacteria	Gammaproteobacteria	Betaproteobacteriales	Burkholderiaceae	Acidovorax	0.000183072	0.000290681	0.000336998	0.00207941	0.000211896	0.000266623	0.000587109	0.000333923	0.000392656	0.000842334	0.00762019	0.000126654
Bacteria	Proteobacteria	Gammaproteobacteria	Betaproteobacteriales	Burkholderiaceae	Aquabacterium	0	0	0	0	0	0	2.79576e-05	5.00885e-05	0.000189558	0.00346293	0	0
Bacteria	Proteobacteria	Gammaproteobacteria	Betaproteobacteriales	Burkholderiaceae	Burkholderia-Caballeronia-Paraburkholderia	0.388682	0.333508	0.140384	0.0518722	0.00822156	0.0373887	0.120148	0.102164	0.0687283	0.307882	0.312637	0.0692513
Bacteria	Proteobacteria	Gammaproteobacteria	Betaproteobacteriales	Burkholderiaceae	Caenimonas	8.13653e-05	5.81362e-05	0	0	2.11896e-05	2.05095e-05	0.00011183	3.33923e-05	4.06196e-05	0	0	0
Bacteria	Proteobacteria	Gammaproteobacteria	Betaproteobacteriales	Burkholderiaceae	Comamonas	0.000142389	0	0	1.41457e-05	0	0	1.39788e-05	0.00021705	6.76993e-05	0	0	0
Bacteria	Proteobacteria	Gammaproteobacteria	Betaproteobacteriales	Burkholderiaceae	Delftia	0	0	0	0	4.23792e-05	0	0	0	0	0	0	0
Bacteria	Proteobacteria	Gammaproteobacteria	Betaproteobacteriales	Burkholderiaceae	Glaciimonas	0	1.93787e-05	0	0	0	0	0	5.00885e-05	9.4779e-05	0	0	0
Bacteria	Proteobacteria	Gammaproteobacteria	Betaproteobacteriales	Burkholderiaceae	Herbaspirillum	0	1.93787e-05	0	0	0	0	0.000279576	0.000768024	0.000270797	0	0	0
Bacteria	Proteobacteria	Gammaproteobacteria	Betaproteobacteriales	Burkholderiaceae	Herminiimonas	0	0	0	0	0	0	0	3.33923e-05	2.70797e-05	0	0	0
Bacteria	Proteobacteria	Gammaproteobacteria	Betaproteobacteriales	Burkholderiaceae	Ideonella	0	0	0	0.0026028	0	0	2.79576e-05	0	0	0.00284522	0	0
Bacteria	Proteobacteria	Gammaproteobacteria	Betaproteobacteriales	Burkholderiaceae	Limnobacter	0	0	0	0	0	0	0	0	0	0.00140389	0	0
Bacteria	Proteobacteria	Gammaproteobacteria	Betaproteobacteriales	Burkholderiaceae	Limnohabitans	0	0	0	0	0	0	0	6.67847e-05	0	0	0	2.81452e-05
Bacteria	Proteobacteria	Gammaproteobacteria	Betaproteobacteriales	Burkholderiaceae	Massilia	0.000183072	0.000193787	0	0.00444174	0	0	6.98939e-05	0.00278826	0.000176018	0.00224622	0	0.00109766
Bacteria	Proteobacteria	Gammaproteobacteria	Betaproteobacteriales	Burkholderiaceae	Ottowia	0	0	0	0	0	2.05095e-05	0	1.66962e-05	0	0	0	0
Bacteria	Proteobacteria	Gammaproteobacteria	Betaproteobacteriales	Burkholderiaceae	Oxalicibacterium	0	0	4.81425e-05	0	0	0	0	6.67847e-05	5.41594e-05	0	0	0
Bacteria	Proteobacteria	Gammaproteobacteria	Betaproteobacteriales	Burkholderiaceae	Pandoraea	0	0	0	0.00298474	0	0.000676812	0	0	0	0	0	0
Bacteria	Proteobacteria	Gammaproteobacteria	Betaproteobacteriales	Burkholderiaceae	Paucibacter	0	0	0	0.000381933	0	0	1.39788e-05	0.000717935	8.12392e-05	0	0.000288049	0
Bacteria	Proteobacteria	Gammaproteobacteria	Betaproteobacteriales	Burkholderiaceae	Pelomonas	0	0.000116272	0	0.00533292	0	0	0	0	0	0	0.00306379	0
Bacteria	Proteobacteria	Gammaproteobacteria	Betaproteobacteriales	Burkholderiaceae	Pigmentiphaga	0	0	0	0	0	0	0	5.00885e-05	1.35399e-05	0	0	0
Bacteria	Proteobacteria	Gammaproteobacteria	Betaproteobacteriales	Burkholderiaceae	Polaromonas	0.0148695	0.0113172	0.000465378	0	0.0114848	0.00352763	0.0213037	0.00437439	0.0105069	0.00063643	0	0.00893611
Bacteria	Proteobacteria	Gammaproteobacteria	Betaproteobacteriales	Burkholderiaceae	Ralstonia	0.000142389	0.000174408	0	0	0	0.00139464	0	0	0	0	0	0
Bacteria	Proteobacteria	Gammaproteobacteria	Betaproteobacteriales	Burkholderiaceae	Ramlibacter	0.00126116	0.000465089	0.000802375	0	0	0	2.79576e-05	8.34808e-05	4.06196e-05	0	0	0
Bacteria	Proteobacteria	Gammaproteobacteria	Betaproteobacteriales	Burkholderiaceae	Rhizobacter	0	7.75149e-05	0	0	0.000190706	0	0.000307533	0.000166962	0.000216638	0	0	0
Bacteria	Proteobacteria	Gammaproteobacteria	Betaproteobacteriales	Burkholderiaceae	Rhodoferax	6.1024e-05	7.75149e-05	0	0	0.000254275	0.000102547	0.000251618	0.000968377	0.000609294	0.00342549	0	0
Bacteria	Proteobacteria	Gammaproteobacteria	Betaproteobacteriales	Burkholderiaceae	Tepidimonas	0.000488192	0	0	0	0	0.000984454	0	0	0	0	0	0
Bacteria	Proteobacteria	Gammaproteobacteria	Betaproteobacteriales	Burkholderiaceae	Variovorax	0.0327902	0.0292231	0.00089866	0	0.000360223	0.0012921	0.00170541	0.00190336	0.00139461	0.000954645	0	0
Bacteria	Proteobacteria	Gammaproteobacteria	Betaproteobacteriales	Burkholderiaceae	Verticia	0.00134253	0.00133713	0	0	0	0.00301489	6.98939e-05	0.000617758	0.000555134	0	2.61862e-05	0
Bacteria	Proteobacteria	Gammaproteobacteria	Betaproteobacteriales	Burkholderiaceae	Xenophilus	0	0	0	0	0	0	4.19363e-05	0	0	0	0	0
Bacteria	Proteobacteria	Gammaproteobacteria	Betaproteobacteriales	Burkholderiaceae	Xylophilus	0	0	0	0	0	0	0	1.66962e-05	6.76993e-05	0	0	0
Bacteria	Proteobacteria	Gammaproteobacteria	Betaproteobacteriales	Burkholderiaceae	uncultured	0.000711946	0.000872042	4.81425e-05	0	0.00048736	6.15284e-05	0.00107637	0.00065115	0.000595754	3.74371e-05	0	0.00225162
Bacteria	Proteobacteria	Gammaproteobacteria	Betaproteobacteriales	Chitinibacteraceae	Amantichitinum	0	0	0	0	0	0	0.000587109	0.000250442	0.000121859	0	0	0
Bacteria	Proteobacteria	Gammaproteobacteria	Betaproteobacteriales	Chitinibacteraceae	Silvimonas	0	0	0	0	0	0	0.000195703	0.000200354	0.000311417	0	0	0
Bacteria	Proteobacteria	Gammaproteobacteria	Betaproteobacteriales	Hydrogenophilaceae	Thiobacillus	0	3.87574e-05	0	0	0	0	0	0	0	0.00144133	0	0
Bacteria	Proteobacteria	Gammaproteobacteria	Betaproteobacteriales	Hydrogenophilaceae	uncultured	0	0	0.000304903	0.00541779	0	0	0	1.66962e-05	0	0	0	0
Bacteria	Proteobacteria	Gammaproteobacteria	Betaproteobacteriales	Methylophilaceae	Ambiguous_taxa	0	0	0.000272808	0	0	0	0	0	0	0	0	0
Bacteria	Proteobacteria	Gammaproteobacteria	Betaproteobacteriales	Methylophilaceae	UBA6140	0.000183072	0.000465089	0	0	0	0	0.000139788	0.00021705	8.12392e-05	0	0	0
Bacteria	Proteobacteria	Gammaproteobacteria	Betaproteobacteriales	Neisseriaceae	uncultured	0	0	0	0	0	0	0	0	1.35399e-05	0	0.00264481	0
Bacteria	Proteobacteria	Gammaproteobacteria	Betaproteobacteriales	Rhodocyclaceae	Denitratisoma	0	1.93787e-05	0	0	0	0	0	0	0	0	0	0.0016465
Bacteria	Proteobacteria	Gammaproteobacteria	Betaproteobacteriales	Rhodocyclaceae	Uliginosibacterium	0	0	0	0	0	0	0	0	4.06196e-05	0	0	0
Bacteria	Proteobacteria	Gammaproteobacteria	Betaproteobacteriales	Rhodocyclaceae	uncultured	0	0	0	0	0	0	0	0	2.70797e-05	0	0	0
Bacteria	Proteobacteria	Gammaproteobacteria	Betaproteobacteriales	SC-I-84	Ambiguous_taxa	0	0	0	0.000367787	0	0	0	0	0	0	0	0
Bacteria	Proteobacteria	Gammaproteobacteria	Betaproteobacteriales	SC-I-84	uncultured beta proteobacterium	0	0	0	0.00403152	0	0	0	0	0	0	0	0
Bacteria	Proteobacteria	Gammaproteobacteria	Cellvibrionales	Cellvibrionaceae	Cellvibrio	0	0	0	0	0	0	0	0.000200354	0.000203098	0	0	0
Bacteria	Proteobacteria	Gammaproteobacteria	Competibacterales	Competibacteraceae	Candidatus Competibacter	0	0	0	0	0	0.000553755	0	0	0	0	0	0
Bacteria	Proteobacteria	Gammaproteobacteria	Diplorickettsiales	Diplorickettsiaceae	Rickettsiella	0	0	0	0.00316863	0	0	0	3.33923e-05	0	0	0	0
Bacteria	Proteobacteria	Gammaproteobacteria	Diplorickettsiales	Diplorickettsiaceae	uncultured	0	5.81362e-05	8.02375e-05	0	0	0	2.79576e-05	3.33923e-05	0	0	0	0
Bacteria	Proteobacteria	Gammaproteobacteria	Enterobacteriales	Enterobacteriaceae	Ambiguous_taxa	0.000447509	3.87574e-05	0.000609805	0.00297059	0	0.00730137	0.000265597	0.000550973	0.000582214	0.015761	0.000130931	0.00439066
Bacteria	Proteobacteria	Gammaproteobacteria	Enterobacteriales	Enterobacteriaceae	Arsenophonus	0	0	0.000561663	0	0	0	0	0	0	0	0.00748926	0
Bacteria	Proteobacteria	Gammaproteobacteria	Enterobacteriales	Enterobacteriaceae	Buchnera	0	0	0	0	0	0.000287132	0	0	0	0	0	0
Bacteria	Proteobacteria	Gammaproteobacteria	Enterobacteriales	Enterobacteriaceae	Buttiauxella	0	0	0	0	0	0	0	1.66962e-05	1.35399e-05	0.00219007	0	0
Bacteria	Proteobacteria	Gammaproteobacteria	Enterobacteriales	Enterobacteriaceae	Enterobacter	0	0	0	0	0.00281821	0.000881907	0.000335491	3.33923e-05	0	0	0	1.40726e-05
Bacteria	Proteobacteria	Gammaproteobacteria	Enterobacteriales	Enterobacteriaceae	Escherichia-Shigella	0	0.000290681	0	1.41457e-05	2.11896e-05	0	0	0	2.70797e-05	0	0	0.001745
Bacteria	Proteobacteria	Gammaproteobacteria	Enterobacteriales	Enterobacteriaceae	Hafnia-Obesumbacterium	0	0	0	0	0	0	0	0	0	0	0.00612758	0.00329299
Bacteria	Proteobacteria	Gammaproteobacteria	Enterobacteriales	Enterobacteriaceae	Klebsiella	0	0	0	0	0	0	0	1.66962e-05	2.70797e-05	0	0	4.22178e-05
Bacteria	Proteobacteria	Gammaproteobacteria	Enterobacteriales	Enterobacteriaceae	Raoultella	0.000223755	5.81362e-05	0	0	0	0	0	0	0	0	0	0
Bacteria	Proteobacteria	Gammaproteobacteria	Enterobacteriales	Enterobacteriaceae	Serratia	0.000142389	0.000213166	0.000545615	0.00629482	0.00709851	0.00869601	0.000209682	0.00310549	0.00324957	0.0176329	0.00751545	0.00955531
Bacteria	Proteobacteria	Gammaproteobacteria	Enterobacteriales	Enterobacteriaceae	Siccibacter	0	0	0	0	0	0	2.79576e-05	1.66962e-05	0	0	0	0
Bacteria	Proteobacteria	Gammaproteobacteria	Gammaproteobacteria Incertae Sedis	Unknown Family	Acidibacter	0	5.81362e-05	0	0.00257451	0	0	0.000209682	1.66962e-05	8.12392e-05	0.000112311	0.00542055	0
Bacteria	Proteobacteria	Gammaproteobacteria	Gammaproteobacteria Incertae Sedis	Unknown Family	Candidatus Berkiella	0	0	0.000866565	0	0	0	0	0	4.06196e-05	0	0	0
Bacteria	Proteobacteria	Gammaproteobacteria	Gammaproteobacteria Incertae Sedis	Unknown Family	uncultured soil bacterium	2.03413e-05	7.75149e-05	0	0	0	0	0	0	0	0	0	0
Bacteria	Proteobacteria	Gammaproteobacteria	Legionellales	Legionellaceae	Legionella	0.000223755	1.93787e-05	0.0022627	0.00983124	0.00699256	0.00299438	1.39788e-05	0.000116873	4.06196e-05	0.00376242	0	0
Bacteria	Proteobacteria	Gammaproteobacteria	Oceanospirillales	Halomonadaceae	Halomonas	0	0.000251923	0	0	0	0	0	0	0	0	0.0034304	0
Bacteria	Proteobacteria	Gammaproteobacteria	Oceanospirillales	Marinomonadaceae	Marinomonas	0.00370212	0.000852664	0.00922731	0.0299605	0.0546056	0.0416957	0.000615066	0.000300531	4.06196e-05	0.0351908	0.0997957	0.0588939
Bacteria	Proteobacteria	Gammaproteobacteria	Pasteurellales	Pasteurellaceae	Ambiguous_taxa	0	0	0	0	0	0.000615284	0	0	0	0	0	0
Bacteria	Proteobacteria	Gammaproteobacteria	Pseudomonadales	Moraxellaceae	Acinetobacter	0	1.93787e-05	3.2095e-05	0	0.00440743	0	2.79576e-05	0	0	0.0294068	0.00319472	0.00136504
Bacteria	Proteobacteria	Gammaproteobacteria	Pseudomonadales	Moraxellaceae	Alkanindiges	8.13653e-05	0	0.000288855	0	0.00144089	0	0.00708724	0.0137076	0.0125515	0	0	0
Bacteria	Proteobacteria	Gammaproteobacteria	Pseudomonadales	Moraxellaceae	Enhydrobacter	0	1.93787e-05	0	0	0.000105948	4.10189e-05	0	0	0	9.35926e-05	0.0013355	5.62905e-05
Bacteria	Proteobacteria	Gammaproteobacteria	Pseudomonadales	Moraxellaceae	Psychrobacter	0	0	0	0	0	0	6.98939e-05	0	0	0.00245213	0	0.0029271
Bacteria	Proteobacteria	Gammaproteobacteria	Pseudomonadales	Moraxellaceae	uncultured	0	0	0	0	0	0	2.79576e-05	1.66962e-05	1.35399e-05	0	0	0
Bacteria	Proteobacteria	Gammaproteobacteria	Pseudomonadales	Pseudomonadaceae	Pseudomonas	0.00193243	0.0114141	0.00409211	0.0118541	0.00417435	0.0110341	0.00444525	0.0421244	0.0248321	0.0104262	2.61862e-05	0.0134816
Bacteria	Proteobacteria	Gammaproteobacteria	R7C24	uncultured bacterium	uncultured bacterium	0	0	0	0.00169748	0	0	0	0	0	0	0	0
Bacteria	Proteobacteria	Gammaproteobacteria	Salinisphaerales	Solimonadaceae	Ambiguous_taxa	0	0	0	0	0	0	0.000265597	6.67847e-05	0.000528055	0	0	0
Bacteria	Proteobacteria	Gammaproteobacteria	Salinisphaerales	Solimonadaceae	Alkanibacter	0	0	0	0	0	0	1.39788e-05	5.00885e-05	1.35399e-05	0	0	0
Bacteria	Proteobacteria	Gammaproteobacteria	Salinisphaerales	Solimonadaceae	Nevskia	0	0	0	0	0	0	0.00328501	0.000300531	0.00403488	0	0	0
Bacteria	Proteobacteria	Gammaproteobacteria	Steroidobacterales	Steroidobacteraceae	uncultured	0	0	0.000208618	0	0	0	1.39788e-05	0	0	0	0	0
Bacteria	Proteobacteria	Gammaproteobacteria	Thiotrichales	Thiotrichaceae	Thiothrix	0	0	0	0	0	0	0	0	0	0.00146005	0	0
Bacteria	Proteobacteria	Gammaproteobacteria	Vibrionales	Vibrionaceae	Vibrio	0	5.81362e-05	0.0025676	0.00490855	0.01051	0.00155872	4.19363e-05	3.33923e-05	8.12392e-05	0.0113247	0.00879858	0.00239234
Bacteria	Proteobacteria	Gammaproteobacteria	WD260	Ambiguous_taxa	Ambiguous_taxa	0	0	0	0	0	0	0	1.66962e-05	1.35399e-05	0	0	0
Bacteria	Proteobacteria	Gammaproteobacteria	WD260	uncultured bacterium	uncultured bacterium	0	0	0	0	0	0	1.39788e-05	0	1.35399e-05	0	0	0
Bacteria	Proteobacteria	Gammaproteobacteria	Xanthomonadales	Rhodanobacteraceae	Ambiguous_taxa	0.000122048	0.000193787	0.000160475	0	0	0.00100496	0.156073	0.0643136	0.0845835	5.61556e-05	0.00293286	5.62905e-05
Bacteria	Proteobacteria	Gammaproteobacteria	Xanthomonadales	Rhodanobacteraceae	Dokdonella	0	0	0.0019578	0	0	0	0	0	9.4779e-05	0	0	0
Bacteria	Proteobacteria	Gammaproteobacteria	Xanthomonadales	Rhodanobacteraceae	Dyella	0.000325461	3.87574e-05	0.00025676	0	0	0	0.000545172	0.000701239	0.000676993	0	0	1.40726e-05
Bacteria	Proteobacteria	Gammaproteobacteria	Xanthomonadales	Rhodanobacteraceae	Luteibacter	0.0277863	0.059764	0.00444516	0.0058846	0.00256394	0.0177817	0.0080378	0.0150766	0.0387646	0.00516631	0	0.0180974
Bacteria	Proteobacteria	Gammaproteobacteria	Xanthomonadales	Rhodanobacteraceae	Rhodanobacter	0.00764834	0.0254636	0.185268	0.00918054	0	2.05095e-05	0.000587109	0.00966708	0.0443024	5.61556e-05	5.23725e-05	0
Bacteria	Proteobacteria	Gammaproteobacteria	Xanthomonadales	Rhodanobacteraceae	uncultured	0	9.68936e-05	0.0015887	1.41457e-05	0.00322082	0	0	1.66962e-05	1.35399e-05	0	0	0
Bacteria	Proteobacteria	Gammaproteobacteria	Xanthomonadales	Xanthomonadaceae	Ambiguous_taxa	0	7.75149e-05	0	0	0.00052974	0.000143566	8.38727e-05	6.67847e-05	0	0	0	0
Bacteria	Proteobacteria	Gammaproteobacteria	Xanthomonadales	Xanthomonadaceae	Luteimonas	0	5.81362e-05	0	0	0	0	0	0	0	0	0	0
Bacteria	Proteobacteria	Gammaproteobacteria	Xanthomonadales	Xanthomonadaceae	Lysobacter	0	0	0.00019257	0	0	0	0	0	0	0	0	0
Bacteria	Proteobacteria	Gammaproteobacteria	Xanthomonadales	Xanthomonadaceae	Pseudoxanthomonas	0	0	0.000304903	0.00198039	0	0	0.000125809	0.00345611	0.00293815	0	0.00688698	0
Bacteria	Proteobacteria	Gammaproteobacteria	Xanthomonadales	Xanthomonadaceae	Stenotrophomonas	0.000162731	0.00306184	0	0	0.0159981	0.00324049	0.0172918	0.0048085	0.00093425	0.0013103	0	0.00365888
Bacteria	Proteobacteria	Gammaproteobacteria	Xanthomonadales	Xanthomonadaceae	Thermomonas	0	7.75149e-05	0	0	0.00275465	0.000922925	0	0	0	0	0	0
Bacteria	Rokubacteria	NC10	Rokubacteriales	uncultured bacterium	uncultured bacterium	6.1024e-05	0	0	0	0	0	0	0	0	0.00241469	0	0
Bacteria	Synergistetes	Synergistia	Synergistales	Synergistaceae	uncultured	0	0	0	0	0	0	0	0	0	0	0	0.00213904
Bacteria	Verrucomicrobia	Verrucomicrobiae	Chthoniobacterales	Chthoniobacteraceae	Chthoniobacter	0	1.93787e-05	0.00044933	0	0	0	0.000740875	0.000517581	0.00094779	0	0	0
Bacteria	Verrucomicrobia	Verrucomicrobiae	Chthoniobacterales	Chthoniobacteraceae	LD29	0	0	0	0	0	0	1.39788e-05	3.33923e-05	4.06196e-05	0	0	0
Bacteria	Verrucomicrobia	Verrucomicrobiae	Chthoniobacterales	Terrimicrobiaceae	Terrimicrobium	0.00154594	0.0014534	0	0	0	0	0.000643024	0.00263799	0.00289753	0	0	0
Bacteria	Verrucomicrobia	Verrucomicrobiae	Chthoniobacterales	Xiphinematobacteraceae	Candidatus Xiphinematobacter	0.00181038	0.00164719	0	0	0	0.00931129	0.000950557	0.00197015	0.00507745	0	0	0.00201238
Bacteria	Verrucomicrobia	Verrucomicrobiae	Methylacidiphilales	Methylacidiphilaceae	uncultured	2.03413e-05	0.00133713	0.000529568	0	0	0	0.000307533	0.000634454	0.00125921	0	2.61862e-05	0
Bacteria	Verrucomicrobia	Verrucomicrobiae	Opitutales	Opitutaceae	Ambiguous_taxa	0	0	0	0	0	0	0.000125809	0.0043577	0.000541594	0	2.61862e-05	0
Bacteria	Verrucomicrobia	Verrucomicrobiae	Opitutales	Opitutaceae	Cephaloticoccus	0	0	0	0	0	0	5.59151e-05	0.000166962	0.000148938	0	0	0
Bacteria	Verrucomicrobia	Verrucomicrobiae	Opitutales	Opitutaceae	Lacunisphaera	0	0	0	0.00123067	0	0	0	5.00885e-05	0.000121859	0	0	0
Bacteria	Verrucomicrobia	Verrucomicrobiae	Opitutales	Opitutaceae	Opitutus	0	0	0	0	0	0	1.39788e-05	6.67847e-05	6.76993e-05	0	0	0
Bacteria	Verrucomicrobia	Verrucomicrobiae	Opitutales	Opitutaceae	uncultured	0	0	0	0	0	0	0	0	2.70797e-05	0	0	0
Bacteria	Verrucomicrobia	Verrucomicrobiae	Pedosphaerales	Pedosphaeraceae	Ambiguous_taxa	0	0	0.00012838	0	0	0	0.000950557	0.000283835	0.000595754	0	0	0
Bacteria	Verrucomicrobia	Verrucomicrobiae	Pedosphaerales	Pedosphaeraceae	bacterium enrichment culture clone auto10_4W	0	0	0	0	0	0	0.000125809	0	2.70797e-05	0	0	0
Bacteria	Verrucomicrobia	Verrucomicrobiae	Pedosphaerales	Pedosphaeraceae	metagenome	0	0	0	0	0	0	0	0	2.70797e-05	0	0	0
Bacteria	Verrucomicrobia	Verrucomicrobiae	Pedosphaerales	Pedosphaeraceae	uncultured Verrucomicrobia bacterium	0	0	0	0	0	0	0.000433342	0.000283835	0.000676993	0	0	0
Bacteria	Verrucomicrobia	Verrucomicrobiae	Pedosphaerales	Pedosphaeraceae	uncultured bacterium	0	0	0	0	0	0	4.19363e-05	0	2.70797e-05	0	0	0
Bacteria	Verrucomicrobia	Verrucomicrobiae	Verrucomicrobiales	Rubritaleaceae	Luteolibacter	0.0381807	0.0280798	0.000160475	0	0.00909033	0.00319947	0.00243231	0.00831469	0.0024101	0	0	0.0013369
Bacteria	Verrucomicrobia	Verrucomicrobiae	Verrucomicrobiales	Verrucomicrobiaceae	Prosthecobacter	0	0	0.000208618	0	0	0	0	0.000450796	0.000121859	0	0	0
Bacteria	Verrucomicrobia	Verrucomicrobiae	Verrucomicrobiales	Verrucomicrobiaceae	Roseimicrobium	0	0	0	0	0	0	0	0.000133569	0	0	0	0
Bacteria	Verrucomicrobia	Verrucomicrobiae	Verrucomicrobiales	Verrucomicrobiaceae	uncultured	0	0	0	0	0	0	0	0.000133569	2.70797e-05	0	0	0
Bacteria	Verrucomicrobia	Verrucomicrobiae	uncultured	uncultured bacterium	uncultured bacterium	0	9.68936e-05	0	0	0	0	1.39788e-05	8.34808e-05	2.70797e-05	0	0	0
Bacteria	WPS-2	Ambiguous_taxa	Ambiguous_taxa	Ambiguous_taxa	Ambiguous_taxa	0	0	0	0	0	0	0.000139788	0.000150265	0.000230178	0	0	0
Bacteria	WPS-2	uncultured bacterium	uncultured bacterium	uncultured bacterium	uncultured bacterium	0	0	0	0	0	0	0	3.33923e-05	0	0	0	0
